## Age-specific differences in the dynamics of protective immunity to influenza

Sylvia Ranjeva<sup>a</sup>, Rahul Subramanian<sup>a</sup>, Vicky J. Fang<sup>b</sup>, Gabriel M. Leung<sup>b</sup>, Dennis K. M. Ip<sup>b</sup>,  
Ranawaka A. P. M. Perera<sup>b</sup>, J. S. Malik Peiris<sup>b</sup>, Benjamin J. Cowling<sup>b\*</sup>, Sarah Cobey<sup>a\*</sup>

<sup>a</sup>Department of Ecology and Evolution, University of Chicago, Chicago, IL, USA

<sup>b</sup>WHO Collaborating Centre for Infectious Disease Epidemiology and Control, School of Public Health, University of Hong Kong, Hong Kong, China

\*These authors contributed equally.

### Abstract

Influenza A viruses evolve rapidly to escape host immunity, such that individuals may be infected multiple times with the same subtype. The form and duration of protective immunity after each influenza infection are poorly understood. Here, we quantify the dynamics of protective immunity against influenza A virus infections by fitting individual-level mechanistic models to longitudinal serology from children and adults in a household cohort study. We find that most protection in children is explained by antibody titers measured by the hemagglutination inhibition (HI) assay. In contrast, in adults, HI antibody titers explain a smaller fraction of protection. Protection against circulating strains wanes to approximately 50% of peak levels 2-4 years after infection in both age groups, and wanes faster against influenza A(H3N2) than A(H1N1)pdm09. Our results suggest that the focus of influenza immune responses changes over time from the highly mutable HA head to other epitopes. This work underscores the need for longitudinal data on multiple components of the immune response to better understand differences in susceptibility within populations.

Like many antigenically variable pathogens, influenza viruses continuously evolve to escape host immunity. As a consequence, they cause frequent epidemics and infect people repeatedly during their lives. The details of these processes—which are vital to influenza epidemiology, evolution, and the design of effective vaccines—have nonetheless remained surprisingly difficult to pin down despite nearly 70 years of study.

A major challenge is uncertainty about the nature of acquired immunity. Antibodies are the primary means of protection against influenza and impose strong selection on its surface proteins [1, 2]. Antibody responses to influenza are highly cross-reactive, in that antibodies induced by infection or vaccination with one strain often protect against infections with related strains [3, 4]. The duration and specificity of protection have been difficult to estimate, partly because the relationship between antibody titer and protection appears complex, and also because longitudinal observations of antibody titers and infections are rare. The most common measure of anti-influenza antibody is provided by the hemagglutination inhibition (HI) assay, and HI antibody titers are an established correlate of protection [5]. The HI titer corresponding to 50% protection against infection, commonly cited as 40 [6, 7], may vary by influenza A subtype and host age [8, 9], although measurement error, long intervals between titer measurements, and small titer changes after infection complicate inferences. Recent models have made progress by incorporating measurement error [10, 11], representing infections as latent states [10, 12, 13], and using titers to historic strains to measure the intervals between infections [10], attack rates [11, 12], and the breadth of the response over time [10, 13]. But the relatively short periods of observation in these studies have made it difficult to estimate some basic quantities in the response to infection, namely, how long protection lasts, and whether antibody titers adequately reflect the strength of immunity against infection in individuals over time.

Longitudinal cohorts provide an opportunity for nearly direct observations of the dynamics of infection and protection, and mechanistic models allow hypotheses about these dynamics to be tested. We fit stochastic mechanistic models to influenza antibody titers collected over five years from a large household cohort study including children and adults. These models account for pre-existing immunity, variation in the response to infection, and the possibility that the HI titer is not a good correlate of protection after infection. Their flexibility allows many previous assumptions to be relaxed. For both influenza A subtypes, we estimated the duration of within-subtype and cross-subtype protection, the relationship between HI titer and protection, and the effect of childhood influenza exposures on infection risk later in life. The dynamics inferred from these individual-level models are remarkably consistent with the dynamics of the larger population, and they also support immunological theory of how the antibody response to influenza changes with age.

## Results

### Homosubtypic protection correlates better with anti-HA antibodies in children than adults

We fitted models to data from a cohort of 592 adults (> 15 y) and 114 children (≤ 15 y) followed from 2009 to 2014 in Hong Kong. Members of this cohort were part of a larger household study [14, 15] and were selected because they were not vaccinated as part of

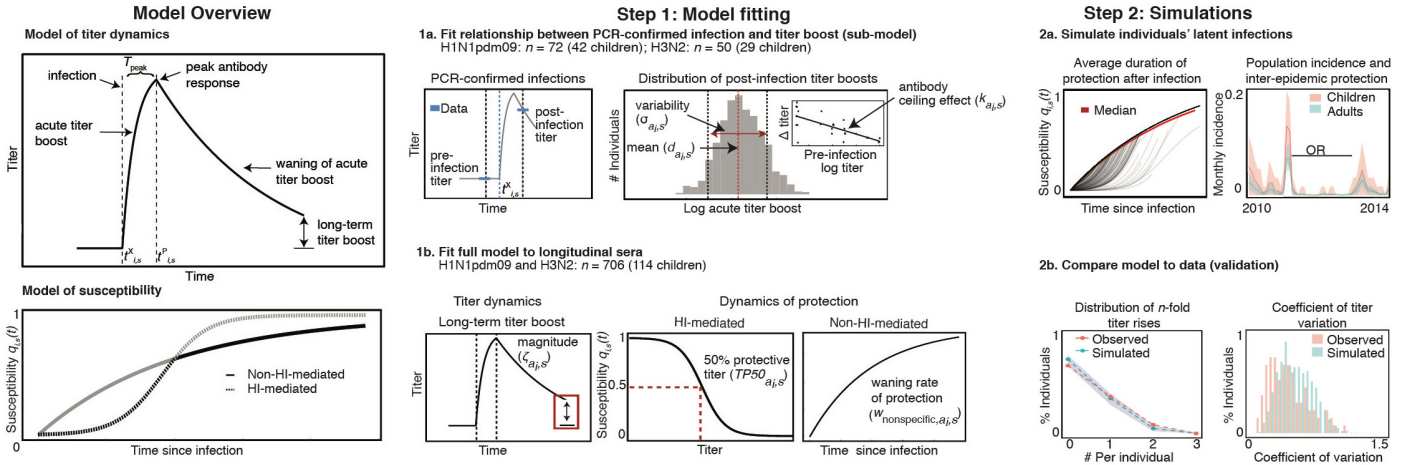

**Figure 1:** Schematic of modeling approach. **Model Overview:** (top) Schematic of HI titer for individual  $i$  against subtype  $s$ . After infection at time  $t_{i,s}^X$ , the titer rises to a peak at time  $t_{i,s}^P$ . The titer then wanes to an individual- and time-specific baseline. Infection may result in a long-term titer boost that does not wane. (bottom) Schematic of susceptibility  $q_{i,s}(t)$  after infection under non-HI-correlated and HI-correlated protection. The solid and dashed lines in the bottom figure show the dynamics of susceptibility under each form of protection in isolation. The black trajectory shows the dynamics under both forms in combination, where the susceptibility at any time is the minimum value predicted by either form. **Step 1:** (a) Inference approach for the sub-model of the short-term post-infection titer dynamics. The data for each individual are the time of PCR-confirmed infection and the closest pre- and post-infection titer measurements. (b) Inference approach for the full model of the immune dynamics, fitted to the full longitudinal serology. **Step 2:** (a) Simulated population-level dynamics. From the latent infections and susceptibility for each individual, we track the loss of protection after infection in the population. We also estimate the incidence and the odds ratios (OR) of protection between epidemics. (b) Model validation. We compare the simulated and observed distributions of  $n$ -fold titer rises and coefficients of titer variation among individuals.

the study and reported no vaccination during the five years of follow-up. Serum samples were obtained every six months and tested for antibodies to circulating strains of influenza A(H3N2) and A(H1N1)pdm09 via the HI assay.

Innate immune responses, cellular immunity, and antibodies are all broadly known to influence protection to influenza. Neutralizing antibodies against the dominant surface proteins, hemagglutinin (HA) and neuraminidase (NA), can target different sites on them, and the specificity of the antibody response appears to change with immune history and age [16, 17, 18, 19, 20]. HI assays measure antibodies to HA but not NA, and they disproportionately measure anti-HA antibodies that attach near the receptor binding site toward the top of the HA globular domain. To characterize the role of these antibodies in protection, we tested three hypotheses, each represented by a dynamical model. These models differ in their representations of the susceptibility of an individual  $i$  to subtype  $s$  at time  $t$ ,  $q_{i,s}(t)$ :

1. *Susceptibility is determined only by HI-correlated factors.* This model assumes that an individual's susceptibility can be measured by their HI titer to the current strain. HI-correlated susceptibility,  $q_{1,i,s}(t)$ , is a logistic function of the current titer, with the shape of the curve set by the titer at which 50% of subjects are protected from infection. This 50% protective titer is defined for each age group  $a \in \{\text{child, adult}\}$ ,  $TP50_{a,i,s}$  (Eq. 7),

$$q_{i,s}(t) = q_{1,i,s}(t). \quad (1)$$

2. *Susceptibility is determined only by non-HI-correlated factors.* This model assumes that susceptibility is parsimoniously explained by the time since last infection with that subtype. Non-HI-correlated susceptibility,  $q_{2,i,s}(t)$ , is an exponential function that starts at 0 (no susceptibility) immediately after infection and wanes at rate  $w_{\text{non-specific},a,i,s}$  (Eq. 8),

$$q_{i,s}(t) = q_{2,i,s}(t). \quad (2)$$

Titers in this model are still informative as indicators of infections, but they do not affect infection risk.

3. *Susceptibility is determined by HI-correlated and non-HI-correlated factors.* This model assumes that an individual's susceptibility is the lesser of their susceptibility from their HI titer to the current strain and the time since their last infection with that subtype,

$$q_{i,s}(t) = \min(q_{1,i,s}(t), q_{2,i,s}(t)). \quad (3)$$

| Subtype   |          | Model ( <i>n</i> parameters)          | Log likelihood (SE) | $\Delta$ AICc |
|-----------|----------|---------------------------------------|---------------------|---------------|
| H1N1pdm09 | Adults   | HI-correlated (2)                     | -4520.7 (0.2)       | 55.1          |
|           |          | Non-HI-correlated (2)                 | -4493.4 (0.9)       | 0.6           |
|           |          | HI-correlated + non-HI-correlated (3) | -4492.1 (0.7)       | 0             |
|           | Children | HI-correlated (2)                     | -1370.1 (0.4)       | 0             |
|           |          | Non-HI-correlated (2)                 | -1381.8 (0.8)       | 23.8          |
|           |          | HI-correlated + non-HI-correlated (3) | -1370.0 (0.5)       | 2.0           |
| H3N2      | Adults   | HI-correlated (2)                     | -5242.2 (0.4)       | 46.6          |
|           |          | Non-HI-correlated (2)                 | -5218.3 (0.8)       | 1.2           |
|           |          | HI-correlated + non-HI-correlated (3) | -5217.9 (0.7)       | 0             |
|           | Children | HI-correlated (2)                     | -1511.6 (0.9)       | 0             |
|           |          | Non-HI-correlated (2)                 | -1524.0 (0.5)       | 24.8          |
|           |          | HI-correlated + non-HI-correlated (3) | -1511.8 (0.6)       | 2.5           |

**Table 1:** Comparisons of the full models (Fig. 1, Step 1b). SE = standard error;  $\Delta$ AICc = absolute difference in the corrected Akaike Information Criterion from the best model.

To evaluate the hypotheses, Eqs. 1-3 were each incorporated into a partially observed Markov model that tracks individuals' HI titers and susceptibility to infection over time while simultaneously accounting for measurement error (Fig. 1, Model Overview; Methods). Infection acutely boosts an individual's titer, which then wanes slowly over one year, potentially leaving a long-term boost that does not wane. To increase accuracy in modeling these acute boosts, we took advantage of 112 PCR-confirmed infections from this study to fit the mean and standard deviation of the titer rises (Fig. 1, Step 1a; section S1.1). We found evidence of an antibody ceiling effect, whereby individuals with higher pre-infection titers have smaller boosts (section S1.2). After fitting this "sub-model" to describe the relationship between infection and short-term titer changes, we then fixed its parameters to fit the full model of titer dynamics to all 706 individuals. The full model estimates the magnitude of the long-term titer boost, the 50% protective titer (for Eqs. 1 and 3), and the rate of waning of non-HI-correlated protection (for Eqs. 2 and 3) (Fig. 1, Step 1b). After adjustment for model complexity, the likelihood of each model measures the statistical support for each hypothesis. Simulating from the maximum likelihood estimates of the best model yields additional information, including the typical duration of protection after infection, attack rates in different epidemics, and the odds ratios of infection from one epidemic to the next (Fig. 1, Step 2a). These simulations are also useful for checking how well the model reproduces different features of the data (Fig. 1, Step 2b).

For both subtypes, the best-fit model in children includes only HI-correlated protection, whereas in adults, there is strong support for both models that include non-HI-correlated protection (Table 1). This result suggests that early in life, protection against influenza virus infection is dominated by immune responses that correlate well with HI titer, such as antibodies to the top of the HA head. However, over time, other immune responses dominate, such that time since infection becomes a better predictor of protection than HI titer. This conceptual model is consistent with the observation that more children than adults in this study have detectable baseline HI titers, and children have higher mean baseline HI titers (Fig. S1, Methods), to circulating strains.

## Natural infection generates age- and subtype-specific protection that declines within several years

Using the best-fit models for each subtype, we next quantified the duration of protection against infection with the same subtype in adults and children.

To estimate the duration of protection in adults, we simulated from the model containing HI-correlated and non-HI-correlated immunity. Using 1000 replicate simulations from the MLEs of each subtype, we tracked the latent susceptibility after infection. For each individual at any time, this susceptibility is given by the minimum of two functions, one set by the titer and the other by the time since infection (Eq. 3). The first function estimates a high 50% protective titer for both subtypes, indicating that antibodies provide little protection (Table 2). The second function estimates that protection wanes with a half-life of 3.4 (95% CI: 2.6, 4.7) y for H1N1pdm09 and 2.1 (95% CI: 1.3, 3.3) y for H3N2 (Table 2). When we plot the component driving susceptibility after each infection, we see that susceptibility is typically determined by the time since infection rather than the titer (Fig. 2). In other words, for both subtypes, the waning rate  $w_{\text{non-specific,adults,s}}$  of non-HI-correlated immunity (Eq. 8) drives the loss of protection, such that an individual regains 50% susceptibility in approximately 3.4 y for H1N1pdm09 and 2.1 y for H3N2. Therefore, the individual trajectories in Fig. 2 (A, B) are constrained from above by the exponential curve describing change in non-HI-correlated protection (Fig. 1, Step 1b). Titers rarely contribute to protection. Notably, the estimated 50% protective titers for both subtypes have wide

| Subtype   | Parameter                            |                                 | MLE [95% CI]                 |
|-----------|--------------------------------------|---------------------------------|------------------------------|
| H3N2      | Long-term boost                      | $\zeta_{adults,s}$              | 0 [0, 0.001]                 |
|           | 50% protective titer                 | $\zeta_{children,s}$            | 0.02 [0, 0.04]               |
|           |                                      | $TP50_{adults,s}$               | 330 [110, 5120]              |
|           | Half-life non-HI-correlated immunity | $TP50_{children,s}$             | 60 [42, 122]                 |
|           |                                      | from $w_{nonspecific,adults,s}$ | $w_{nonspecific,children,s}$ |
| H1N1pdm09 | Long-term boost                      | $\zeta_{adults,s}$              | 0.01 [0, 0.03]               |
|           | 50% protective titer                 | $\zeta_{children,s}$            | 0.2 [0.1, 0.4]               |
|           |                                      | $TP50_{adults,s}$               | 540 [90, 5120]               |
|           | Half-life non-HI-correlated immunity | $TP50_{children,s}$             | 30 [10, 45]                  |
|           |                                      | from $w_{nonspecific,adults,s}$ | $w_{nonspecific,children,s}$ |

**Table 2:** Maximum likelihood estimates and 95% confidence intervals (CI).

confidence intervals, i.e., they are not easily identified when the other form of protection is present (Fig. S2) When we force the models to exclude non-HI-correlated immunity, we estimate values of  $TP50_{adults}$  that are similar to those in children for both H1N1pdm09 ( $TP50_{adults} = 15$ ; 95% CI: 9, 25) and H3N2 ( $TP50_{adults} = 45$ ; 95% CI: 37, 120) (Fig. S3). Infection in adults does not produce a durable titer boost in either H1N1pdm09 or H3N2 (the 95% CI for  $\zeta_{adults,s}$  includes 0 for both subtypes; Table 2).

Compared to adults, children have a more variable duration of protection. Because susceptibility in children depends only on HI titer, the dynamics of individual protection are sensitive to pre-infection titers and differences in the magnitude of the acute boost post-infection. For both H1N1pdm09 and H3N2, we estimated substantial variation in the short-term titer dynamics after PCR-confirmed infection (section S1.2). The variability arises both from stochastic variation in the magnitude of the short-term titer boost and from the antibody ceiling effect (Table S1). Therefore, while the median susceptibility in children reaches 50% after approximately 4 years for H1N1pdm09 and 2 years for H3N2 (Fig. 2 C,D), the individual trajectories vary according to differences in their pre-infection titers and short-term boosts. The shape of the individual trajectories reflects the logistic relationship between titer and susceptibility under HI-correlated protection (Eq. 7 and Fig. 1, Step 1b). Infection with H1N1pdm09 generates a long-term boost in titer that is 20% the value of the acute boost ( $\zeta_{children,s} = 0.2$  (95% CI: 0.1, 0.4), Table 2), allowing individuals to gain long-term protection as their baseline titer eventually rises above the  $TP50_{children}$  through repeated exposures. In H3N2, by contrast, we estimate only a small long-term boost ( $\zeta_{children,s} = 0.01$  (95% CI: 0, 0.03), Table 2), which probably reflects the antigenic evolution of circulating strains and associated update of the strain used in the HI assay during the study.

## The models reproduce population-level patterns of infection and other estimates of protection

Despite being fitted to individuals' titers over time, the models recover reasonable population-level patterns of infection for both subtypes. From the simulated latent infections, we inferred the incidence in children and adults (Fig. 3, Table S2). Because the models assume that the community-level, subtype-specific influenza intensity affects an individual's risk of infection (Methods, Eq. 6), it is unsurprising that periods of high incidence in the simulated study population match those in the community (Fig. 3). However, the absolute incidence in the study population is effectively unconstrained, emerging from the estimated subtype-specific scaled transmission rate,  $\beta_{scaled,s}$ , and protection parameters. The results nonetheless match estimates from other populations. The range of inferred incidences of individual H1N1pdm09 epidemics is 4-8% in adults and 6-17% in children. For H3N2, the epidemic incidences range from 5-17% in adults and from 5-24% in children. Estimates of seasonal influenza incidence in the United States are 5% to 20% based on combined serology and viral infection (of influenza A and B) [21] and 3-11% based on symptomatic PCR-confirmed infections of influenza A [22].

The simulated infections reproduce other estimates of protection over time. We estimated the odds ratios of protection between epidemics (Table 3). We find evidence of inter-epidemic H1N1pdm09 protection for children between 2009 and 2011, consistent with a previous analysis of this trial that used  $\geq 4$ -fold titer rises to indicate infection [15], and we find evidence of protection for adults between 2009 and 2011 and between 2011 and 2013. Protection against H3N2 in both children and adults occurs between 2010 and 2012 and between 2012 and 2013. The point estimates of the ORs inferred from  $\geq 4$ -fold rises in children are lower than those inferred from latent infections in this model, suggesting that there may be greater protection against large titer rises than infection per se.

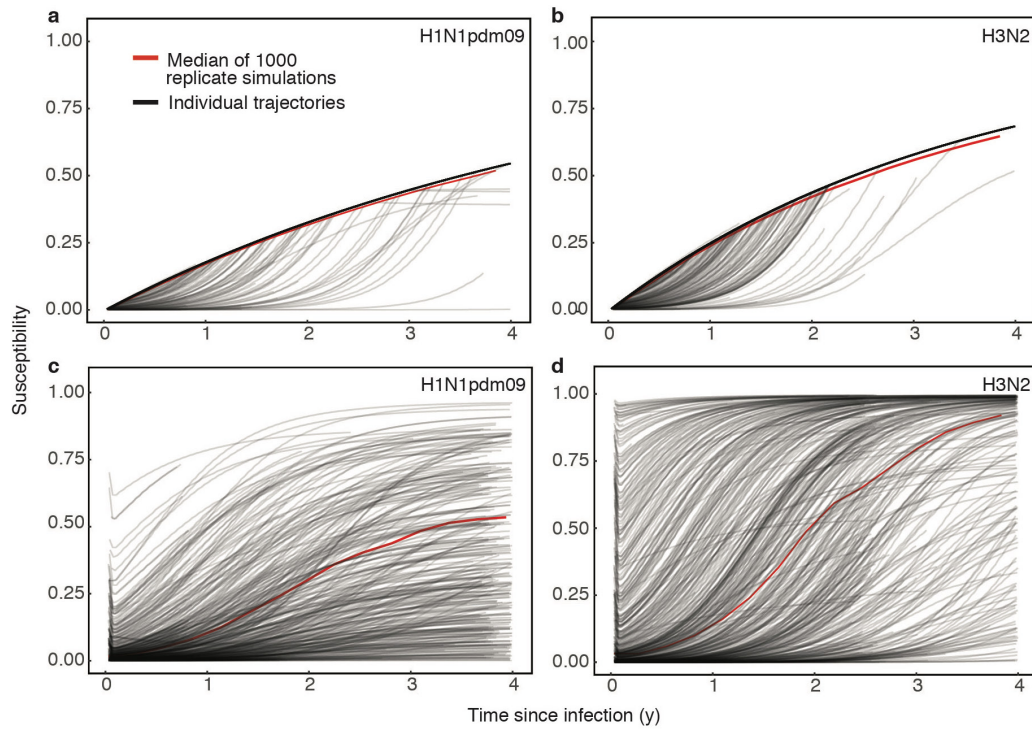

**Figure 2:** Susceptibility after simulated infection (at time  $t = 0$ ) for adults with H1N1pdm09 (a) and H3N2 (b) and for children with H1N1pdm09 (c) and H3N2 (d). The black lines represent individual trajectories from one simulation, and the red line represents the median among individuals over 1000 replicate simulations.

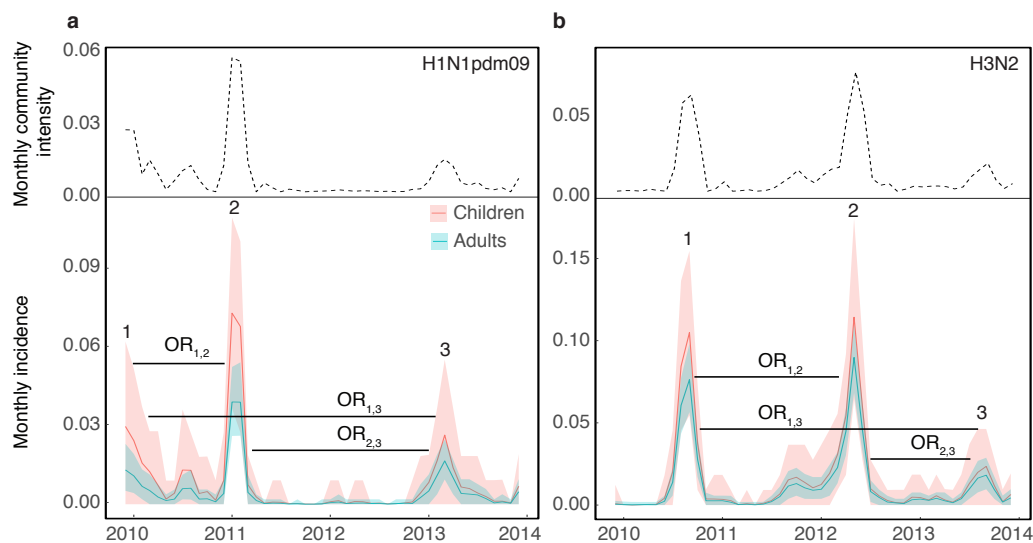

**Figure 3:** Simulated monthly incidence for H1N1pdm09 (a, bottom) and H3N2 (b, bottom) in children and adults, averaged over 1000 simulations, contrasted with respective monthly community intensities (a and b, top). The shaded areas are bounded by the 2.5% and 97.5% quantiles from the simulations. Horizontal black bars denote inter-epidemic periods for odds ratios (OR).



| Subtype   |          |                   | OR [95% quantiles] | Estimate from [15] |
|-----------|----------|-------------------|--------------------|--------------------|
| H1N1pdm09 | Adults   | OR <sub>1,2</sub> | 0.51 [0.44, 0.59]  |                    |
|           |          | OR <sub>2,3</sub> | 0.57 [0.50, 0.66]  |                    |
|           |          | OR <sub>1,3</sub> | 0.86 [0.73, 1.01]  |                    |
|           | Children | OR <sub>1,2</sub> | 0.61 [0.56, 0.65]  | 0.27 [0.10, 0.76]  |
|           |          | OR <sub>2,3</sub> | 0.84 [0.79, 1.02]  |                    |
|           |          | OR <sub>1,3</sub> | 0.94 [0.90, 1.08]  |                    |
| H3N2      | Adults   | OR <sub>1,2</sub> | 0.49 [0.47, 0.56]  |                    |
|           |          | OR <sub>2,3</sub> | 0.54 [0.40, 0.58]  |                    |
|           |          | OR <sub>1,3</sub> | 0.79 [0.73, 1.01]  |                    |
|           | Children | OR <sub>1,2</sub> | 0.81 [0.79, 0.85]  | 0.39 [0.18, 0.83]  |
|           |          | OR <sub>2,3</sub> | 0.71 [0.66, 0.76]  |                    |
|           |          | OR <sub>1,3</sub> | 0.99 [0.98, 1.13]  |                    |

**Table 3:** Inter-epidemic odds ratios of infection, predicted from 1000 replicate simulations of the models for H1N1pdm09 and H3N2 at the MLEs.

### No effect of group-level HA imprinting or heterosubtypic infection on susceptibility

Previous work has suggested that primary infection with a subtype reduces susceptibility to severe disease and death with related subtypes [23, 24]. Influenza A HAs fall into two phylogenetic groups, with H1 and H2 belonging to Group 1 and H3 to Group 2. We estimated the effect  $\alpha_{\text{imp},s}$  of primary infection with a subtype of one HA group on the risk of infection with subtype  $s$  of the same HA group by

$$\lambda_{\text{imp},i,s}(t) = \lambda_{i,s}(t)(\alpha_{\text{imp},s})(p_{\text{imp},i,s}) + \lambda_{i,s}(t)(1 - p_{\text{imp},i,s}), \quad (4)$$

where  $\lambda_{\text{imp},i,s}(t)$  is the force of infection on individual  $i$  with subtype  $s$  at time  $t$  considering imprinting, and  $\lambda_{i,s}(t)$  is the baseline risk for an individual not imprinted with that subtype's HA group (Eq. 6). Since  $p_{\text{imp},i,s}$  is the probability of having had a primary infection with the same group as subtype  $s$ ,  $\alpha_{\text{imp},s}$  is thus the reduction in that baseline force of infection from imprinting. We calculate  $p_{\text{imp},i,s}$  based on the individual's birthdate, the current date, and historical incidence data (Methods, Fig. S4A). Birth-year effects and age-specific effects are often confounded, but are potentially distinguishable by longitudinal data from individuals of similar ages but different primary exposures. We therefore fit the imprinting models for H1N1pdm09 and H3N2 to data from middle-aged adults (35-50 y), whose first exposures were to Group 1 (mainly H2N2) or Group 2 (H3N2) viruses (Fig. S4B). For H3N2, we thus estimate the effect of homosubtypic imprinting, and for H1N1pdm09, we estimate group-level imprinting from primary infection with either H1N1 or H2N2 (Table S3). The likelihoods for the imprinting effect (Fig. S4C) are centered around one for both subtypes, indicating no effect.

Epidemiological and immunological studies have suggested that infection with one subtype might protect against another [25, 26, 27]. To estimate the duration of heterosubtypic protection, we fit a two-subtype model of H1N1pdm09 and H3N2, fixing the parameters that govern homosubtypic immunity at the MLEs of the best-fit single-subtype models (Table 2). Let  $q_{\text{homosubtypic},i,s}$  denote susceptibility to subtype  $s$  determined only by homosubtypic protection. Heterosubtypic protection after infection with subtype  $m \neq s$  contributes to the susceptibility against subtype  $s$  such that the net susceptibility to subtype  $s$ ,  $q_{i,s}(t)$ , is

$$q_{i,s}(t) = \min(q_{\text{hetero},i,s}(t), q_{\text{homosubtypic},i,s}(t)), \quad (5)$$

where  $q_{\text{hetero},i,s}(t)$  is determined by the time since infection with subtype  $m$  (Eq. 15). We assumed the rate of waning of heterosubtypic protection,  $w_{\text{nonspecific},m}$ , is identical for both subtypes. In these data, there is no evidence of heterosubtypic protection: its estimated half-life includes zero (Fig. S5; half life from  $w_{\text{nonspecific},m} = 0.001$  y; 95% CI: 0.0, 0.02).

### Model validation and sensitivity analysis

In addition to comparing the models' results to other estimates of population-level incidence and protection between epidemics, we investigated the models' ability to match other features of the data. The best-fit models reproduce the observed distributions of 1-, 2-, and 4-fold titer rises, considering all individuals' trajectories together (section S2.1; Figs. S7 and S8). However, the models tend to overestimate how much an individual's titer varies over time (section S2.2; Figs. S9 and S10). This suggests the model might not be fully capturing individual heterogeneity in infection risk and/or the response to infection.

Beyond testing multiple hypotheses about the factors that correlate with protection, we examined the robustness of our model to other assumptions. Our results are robust to changes in the initial conditions, namely, how recently individuals are assumed to have been infected (section S2.3). Results also do not change with an alternate scaling of the community influenza intensity to account for increased surveillance during the 2009 H1N1pdm09 pandemic (section S2.4). Additionally, our assumptions about the measurement error are consistent not only with values estimated by others [13, 28] but also with the error estimated from replicate titer measurements in the data (section S2.5).

## Discussion

Our results suggest that protection against influenza A has different origins in adults and children. In children, the HI titer is a good correlate of protection, and infection durably boosts titers against H1N1pdm09. In adults, time since infection is the better correlate of protection, and infection is unassociated with long-term changes in titer. Despite their lower baseline HI titers, adults experience a slightly lower risk of infection than children. These results suggest that children tend to produce antibodies that target the head of the HA, whereas adults rely on antibody responses to other sites or potentially other forms of immunity. This model is consistent with the concepts of antigenic seniority and original antigenic sin. Antigenic seniority refers to the phenomenon in which individuals' highest antibody titers to influenza are to strains circulating in childhood [16], and original antigenic sin is the process by which antibody responses to familiar sites are preferentially reactivated on exposure to new strains [29, 30, 31]. With time, these familiar sites may be the ones that are most conserved. On HA, these sites would tend to be away from the fast-evolving epitopes near the receptor binding domain. For instance, several studies have shown that levels of stalk-directed antibodies increase with age [32, 33].

We estimated that protection in both children and adults to each subtype wanes with an average half life of 2-4 years; protection lasts slightly longer against H1N1pdm09 than H3N2, and lasts slightly longer in adults compared to children against H3N2. Notably, this timescale is consistent with the estimated decay of immunity over 2-10 years due to antigenic evolution in population-level models [34, 35]. In contrast to the model's requirement that non-HI-correlated protection wanes at a constant rate in all adults, the dependence of protection on HI titer in children leads to substantial variation in susceptibility over time (Fig. 2). This heterogeneity may well extend to adults, but we suspect it could be difficult to identify without other assays or much longer time series. The models' tendency to overestimate individuals' titer variation over time suggests that important differences between the quality of individual responses could be missing (Figs. S9 and S10). Longer observation periods and more complete observations of the immune response can help separate these factors from differences in infection risk, and identify if there are indeed people who "never get the flu."

We find no evidence that HA imprinting or heterosubtypic immunity affect susceptibility to infection. Previous analyses of HA group-level imprinting have suggested that imprinting reduces the rate of severe disease and death [23]. Serological testing in this study occurred independent of symptoms. If the model were estimating protection from symptomatic infections instead, imprinting might have been supported. In the same vein, heterosubtypic immunity, for which there is good evidence [25], might reduce the severity of illness rather than prevent infection [36, 37]. Another possibility is that the discordance of H1N1pdm09 and H3N2 epidemic peaks in this study (Figs. 3 and S11) might have reduced the model's power to detect short-term cross-protection (Fig. S5).

This work has several limitations. We return again to the concept of heterogeneity. Though our models support substantial variability in the short-term titer boost after infection, our data lack multiple PCR-confirmed infections from the same people. Thus, we cannot distinguish the nonspecific variability at each infection ( $\sigma_{a_i,s}$ ) from consistent differences between individuals, which might be expected if people persistently target different sites on HA. Additionally, although our results provide insight into differences between children and adults, we cannot model the evolving response in individuals over a lifetime, including in infants and in the elderly. We thus cannot estimate how age-related phenomena interact with immune history to affect the response to infection.

Broadly, our results underscore the need for a deeper understanding of the factors that determine the variable response to infection among individuals, and for better correlates of immune protection. They also underscore the utility of longitudinal cohorts and mechanistic models to investigate the dynamics of influenza.

## Methods

### Study description

The data are part of a community-based study of influenza virus infections in households that was conducted in Hong Kong between 2009 and 2014 [15]. The study tracked individuals in 796 households each of which included at least 1 child aged 6-17 y that had no contraindications against the trivalent inactivated influenza vaccine (TIV). One eligible child 6-17y of age per household was

randomized to receive either a single dose of TIV or saline placebo, regardless of influenza vaccination history. For vaccinated individuals, sera was collected at baseline prior to vaccination (August 2009 - February 2010) and 1 month after vaccination. For all individuals, sera was collected after enrollment in the autumn of 2009 and again each subsequent autumn, and each spring for at least 25% of participants. Participants were invited annually to continue enrollment. Individuals reported receipt of the influenza vaccine outside of the trial annually.

Participants and household contacts were encouraged to record systemic and respiratory symptoms daily in diaries. Acute respiratory infections (ARIs) were surveilled by telephone calls every 2 weeks, and households were encouraged to report ARIs promptly to the study hotline. Home visits were triggered by the presence of any 2 the following: fever ( $\geq 37.8^\circ\text{C}$ ), chills, headache, sore throat, cough, presence of phlegm, coryza, or myalgia in any household member. Combined nasal and throat swabs were collected from all household members during home visits, regardless of illness.

## Ethical approval

The study protocol was approved by the Institutional Review Board of the University of Hong Kong. All adults provided written consent. Parents or legal guardians provided proxy written consent for participants  $\leq 17$  y old, with additional written assent from those 8–17 y.

## Laboratory testing

Serum specimens were tested by HI assays in serial doubling dilutions from an initial dilution of 1:10 [15, 14]. The antibody titer was taken as the reciprocal of the greatest dilution that gave a positive result. Sera from year 1 (2009–2010) and year 2 (2010–2011) were tested against A/California/7/2009(H1N1) and A/Perth/16/2009-like (H3N2). In years 3–5 (2011–2012, 2012–2013, and 2013–2014), sera were tested against the same H1N1pdm09 strain and against A/Victoria/361/2011-like (H3N2). Sera from consecutive years were tested in parallel, such that duplicate titer measurements exist for sera sampled during the middle of the study. For this analysis, we used the first titer measurement obtained for any serum sample. Nose and throat swabs were tested by reverse transcription polymerase chain reaction (PCR) for influenza A and B viruses using standard methods, as described previously [38].

## Data included in this analysis

We fit models to HI titers from a subset of  $n = 706$  individuals (including 114 children  $\leq 15$  y old at enrollment) that were not vaccinated as part of the study and reported no vaccination at any season during follow-up. We excluded individuals with any missing vaccination information. Individuals in this subset were sampled at a median of 6.6 months over a median 5.0 years of follow-up. Among children, the median age at enrollment was 11 y, and the age range was 3–15 y. Among adults, the median age of enrollment was 43 y, the age range was 16–77 y, and 89% of adults were between 25 and 55 y.

We fit sub-models to data from  $n = 50$  individuals (including  $n = 29$  children  $\leq 15$  y old at enrollment) with PCR-confirmed H3N2 infection and  $n = 78$  individuals (including  $n = 42$  children  $\leq 15$  y old at enrollment) with PCR-confirmed H1N1pdm09 infection (section 1.1). No individuals had multiple PCR-confirmed infections. The data for this analysis are the date of subtype-specific PCR-positive nasal swab and the closest titer measurements surrounding the positive swab. For H3N2, the median time between the pre-infection titer measurement and the PCR-positive swab was 5.3 months, and the median time between the PCR-positive swab and the post-infection titer measurement was 2.6 months. For H1N1pdm09, the median time between the pre-infection titer measurement and the PCR-positive swab was 2.4 months, and the median time between the PCR-positive swab and the post-infection titer measurement was 6.6 months.

## Complete model description

### 1. Exposure to infection

Individuals' risks of exposure are based on current subtype-specific influenza activity and age-specific contact rates [39, 8]. For individual  $i$ , the risk of infection with subtype  $s$ ,  $\lambda_{i,s}(t)$ , depends on the subtype- and age-adjusted community-level risk and the individual's susceptibility,

$$\lambda_{i,s}(t) = q_{i,s}(t)\beta_{c,cat_i}\beta_{scaled,s}L_s(t) \quad (6)$$

where  $q_{i,s}(t)$  is the individual's susceptibility to that subtype (or per-infectious-contact probability of infection),  $\beta_{c,cat_i}$  is the fixed contact rate for age category  $cat_i$  (Table S4, section S2.6), and  $L_s(t)$  is a proxy of influenza activity for subtype  $s$ . The parameter  $\beta_{scaled,s}$  scales the flu intensity to determine the per-infectious-contact transmission rate at time  $t$ . We estimate  $\beta_{scaled,s}$  for each subtype by fitting the model to the combined data for children and adults, and then use this value to fix



$\beta_{\text{scaled},s}$  to fit models of the protective dynamics separately in children adults. We calculate  $L_s(t)$  from weekly community surveillance data as (ILI/total general practitioner consultations)(% specimens positive for subtype  $s$ ). We impose a minimum threshold  $\min(L_s(t)) = 10^{-5}$ .

## 2. Susceptibility to infection based on HI titer to the infecting strain, non-HI-correlated protection, or both

We use two base functions to model susceptibility to infection with subtype  $s$ . One function assumes susceptibility depends on the HI titer against the infecting strain (the HI-correlated component), and the other on the time since infection with that subtype (the non-HI-correlated-component).

The HI-correlated component of susceptibility  $q_{1,i,s}(t)$  is a logistic function of the HI titer [7, 40] (Fig. 1, Step 1b). Because previous studies suggest that the relationship between titer and susceptibility changes with age [9], we estimate the relationship separately for children and adults. The susceptibility of individual  $i$  to subtype  $s$  at time  $t$ ,  $q_{1,i,s}(t)$ , is given by the logistic function

$$q_{1,i,s}(t) = 1 - \frac{1}{1 + e^{\phi(\log(h_{i,s}(t)) - \log(TP50_{a_i,s}))}}, \quad (7)$$

where  $h_{i,s}(t)$  is the latent titer and  $TP50_{a_i,s}$  is the subtype- and age-specific location parameter. The scaling parameter  $\phi$ , which determines the shape of the logistic curve, is fixed (Table S4).

The non-HI-correlated component of susceptibility  $q_{2,i,s}(t)$  assumes initially complete protection that wanes at a constant rate after infection,

$$q_{2,i,s}(t) = 1 - e^{-w_{\text{nonspecific},a_i,s}(t-t_{i,s}^X)}, \quad (8)$$

where  $w_{\text{nonspecific},a_i,s}$  is the rate of waning, fitted separately for children and adults, and  $t_{i,s}^X$  is the time of infection.

The susceptibility  $q_{i,s}(t)$  is modeled separately as each component or their combination.

## 3. Boosting and waning after infection

When individual  $i$  is infected with subtype  $s$ , antibody titers increase from the time of infection and eventually peak. The acute boost occurs according to  $f_{\text{rise}}$ ,

$$f_{\text{rise}}(h_{i,s}(t), t_{i,s}^X, t) = h_{i,s}(t_{i,s}^X)^{(1-k_{a_i,s})} d_{i,s}(t_{i,s}^X) \left(1 - e^{-r(t-t_{i,s}^X)}\right), \quad (9)$$

where  $t_{i,s}^X$  and  $h_{i,s}(t_{i,s}^X)$  give the time and titer, respectively, of the most recent infection;  $r$  gives the fixed rate of titer rise after infection (Table S4); and  $d_{i,s}(t_{i,s}^X)$  is the magnitude of the short-term boost. The age- and subtype-specific parameter  $k_{a_i,s}$  governs the dependence of the titer boost on the pre-infection titer. When positive, it allows for an antibody ceiling effect [41], whereby higher pre-infection titers have smaller boosts (section S1.1).

Multiple studies demonstrate heterogeneity in the short-term titer rise following infection [42, 28]. Therefore, we allow for variability in the magnitude of the short-term boost for each infection,

$$\log(d_{i,s}(t_{i,s}^X)) \sim \mathcal{N}(d_{a_i,s}, \sigma_{a_i,s}), \quad (10)$$

where  $d_{a_i,s}$  and  $\sigma_{a_i,s}$  give the age- and subtype-specific log mean and standard deviation, respectively, of the boost. We estimate the parameters  $k_{a_i,s}$ ,  $d_{a_i,s}$ , and  $\sigma_{a_i,s}$  that describe the short-term post-infection titer dynamics from a sub-model fit to data from individuals with PCR-confirmed infection (section S1.1). We then fix the values of these parameters in the main model.

After antibodies peak at time  $t_{i,s}^P$ , the titer wanes exponentially at fixed rate  $w$  (Table S4) to an individual's subtype-specific baseline titer  $h_{\text{baseline},i,s}(t)$ . Therefore, the titer after the peak short-term response is given by

$$f_{\text{wane}}(h_{i,s}(t_{i,s}^P), t_{i,s}^P, t) = \left(h_{i,s}(t_{i,s}^P) - h_{\text{baseline},i,s}(t)\right) e^{-w(t-t_{i,s}^P)}. \quad (11)$$

Infection may cause a long-term boost  $d_{\text{longterm},i,s}(t_{i,s}^X)$  that does not wane, where  $d_{\text{longterm},i,s}(t_{i,s}^X)$  is defined as a fraction  $\zeta_{a_i,s}$  of the acute boost,

$$d_{\text{longterm},i,s}(t_{i,s}^X) = \zeta_{a_i,s} d_{i,s}(t_{i,s}^X). \quad (12)$$

The long-term boost updates the baseline titer after each infection at time  $t_{i,s}^X$  such that

$$h_{\text{baseline},i,s}(t) = h_{\text{baseline},i,s}(t_{i,s}^X) + d_{\text{longterm},i,s}(t_{i,s}^X). \quad (13)$$

Let  $T_{\text{peak}}$  denote the fixed length of time between infection and peak titer (Table S4). The complete expression for  $h_{i,s}(t)$  is then

$$\begin{cases} h_{i,s}(t) = h_{i,s}(t_{i,s}^X) + f_{\text{rise}}(h_{i,s}(t_{i,s}^X), t_{i,s}^X, t), & \text{for } t - t_{i,s}^X < T_{\text{peak}}, \\ h_{i,s}(t) = h_{i,s}(t_{i,s}^X) + f_{\text{wane}}(h_{i,s}(t_{i,s}^P), t_{i,s}^P, t), & \text{for } t - t_{i,s}^X \geq T_{\text{peak}}. \end{cases} \quad (14)$$

#### 4. Heterosubtypic immunity

Heterosubtypic immunity acts as a non-specific form of protection against subtype  $s$  following infection with subtype  $m$  at time  $t_{i,m}^X$  and wanes at rate  $w_{\text{nonspecific},m}$

$$q_{\text{hetero},i,s}(t) = 1 - e^{-w_{\text{nonspecific},m}(t - t_{i,m}^X)}. \quad (15)$$

### Initial conditions

We assign each individual's initial latent subtype-specific baseline titer,  $h_{\text{baseline},i,s}(0)$ , based on the lowest observed titer,  $h_{\text{obs},i,s}^{\min}$ . Because an observed HI titer represents the lower bound of a two-fold dilution, we draw  $h_{\text{baseline},i,s}(0)$  for each realization of the model according to

$$h_{\text{baseline},i,s}(0) \sim U(h_{\text{obs},i,s}^{\min}, 2h_{\text{obs},i,s}^{\min}). \quad (16)$$

The values of the initial latent titer  $h_{i,s}(0)$  and the initial susceptibility  $q_{i,s}(0)$  depend on the time of most recent infection, which may have occurred before entry in the study. To initialize the latent states for each individual, we draw the time of the most recent infection from the density of subtype-specific flu intensity  $L_s(t)$  in the seven years before the first observation. In this way, we account for known epidemic activity in Hong Kong before the beginning of the study (Fig. S6). For children less than 7 y, the distribution is truncated at birth, and the density includes the probability that the child is naive to influenza infection. For sensitivity analysis, we fit the models using other assumptions about the density from which we draw the time of most recent infection (section S2.3 and S2.4).

### Measurement model and likelihood function

The measurement model accounts for error in the titer measurements and the effect of discretization of titer data into fold-dilutions. The observed titer values are fold-dilutions in the range [ $<1:10$ ,  $1:10$ ,  $1:20 \dots$ ,  $1:5120$ ]. Consistent with other models [12, 8, 10], we define a log titer ( $\log H$ ) for any observed titer  $H$ ,

$$\log H = \log_2\left(\frac{H}{10}\right) + 2, \quad (17)$$

such that the observed titers take on discrete values in the range [1,11]. We transform both the observed and latent titers as in Eq. 17. We assume that the observed log titer  $\log H_{\text{obs},i,s}(t)$  against subtype  $s$  is normally distributed around the latent log titer  $\log H_{i,s}(t)$ :

$$\log H_{\text{obs},i,s}(t) \sim \mathcal{N}(\log H_{i,s}(t), \epsilon), \quad (18)$$

where  $\epsilon$  gives the standard deviation of the measurement error. Following other analyses that quantified the measurement error associated with different titers [11, 28], we assign a lower measurement error ( $\epsilon = 0.74$  log titer units, Table S4) for undetectable ( $< 10$ ) titers. The observed titer is censored at integer cutoffs, such that the likelihood of observing  $\log H_{\text{obs},i,s}(t) = j$  given latent titer  $\log H_{i,s}(t)$  is

$$\mathcal{L}(j \mid \theta, \log H_{i,s}(t)) = \begin{cases} f(\log H_{i,s}(t) \leq j), & j = 1 \\ f(j \leq \log H_{i,s}(t) \leq j + 1), & 2 \leq j \leq 10 \\ f(\log H_{i,s}(t) \geq j), & j = 11 \end{cases} \quad (19)$$

where  $\theta$  gives the parameter vector and  $f$  is specified as in Eq. 18.

Table S4 summarizes the estimated model parameters and state variables.

## Likelihood-based inference

The titer dynamics for each individual are modeled as a partially observed Markov process (POMP). The model for each subtype is a “panel POMP” object, or a collection of the individual POMP’s with shared subtype-specific parameters. We use multiple iterated filtering, MIF [43]. Iterated filtering uses sequential Monte Carlo (SMC) to estimate the likelihood of observed time series. In SMC, a population of particles is drawn from the parameters of a given model to generate Monte Carlo samples of the latent dynamic variables. To evaluate the likelihood of a shared parameter set, SMC is carried out over the time series for each individual to generate a log-likelihood for the corresponding panel unit. The log likelihood of the panel POMP object is the sum of the individuals’ log likelihoods. Iterated filtering successively filters the particle population, perturbing the parameters between iterations. The perturbations decrease in amplitude over time, such that the algorithm converges over time to the maximum likelihood estimate. For each model, we initialize the iterated filtering with 100 random parameter combinations. We perform series of successive MIF searches, with the output of each search serving as the initial conditions for the subsequent search. We use 10,000 particles for each optimization routine. The likelihood of the output for each search is calculated by averaging the likelihood from ten passes through the particle filter, each using 20,000 particles. We repeat the optimization until additional operations fail to arrive at a higher maximum likelihood. For model selection, we used the corrected Akaike Information Criterion (AICc) [44]. We obtained maximum likelihood estimates for each parameter and associated 95% confidence intervals by constructing likelihood profiles. We used Monte Carlo Adjusted Profile methods [45] to obtain a smoothed estimate of the profile. The 95% confidence interval was defined by the points that lay 1.92 log-likelihood units below the maximum likelihood estimate on the smoothed profile curve.

## Calculating imprinting probabilities

We calculate the probability that an individual’s first influenza A virus was with a particular subtype (H1N1, H3N2, or H2N2) or that the individual was naive to infection at each year of observation. We assume that the first infection occurred between the ages of 6 months and 12 years old, as infants are protected by maternal antibodies for the first six months of life [46], and over 95% of children have been infected by influenza A before the age of 12 [47, 48]. Following the original imprinting model by Gostic and colleagues [23], we estimate the probability that an individual with birth year  $i$  has his or her first influenza A infection in calendar year  $j$ :

$$v_{i,j} = \frac{(1-A)^{j-1}A}{\sum_{j=1}^{i+12}(1-A)^{j-1}A}. \quad (20)$$

Here,  $A$  is the constant annual attack rate in seronegative children as estimated by Gostic and colleagues ( $A = 0.28$ , [23]). Given observation year  $y$ , the probability that individual  $i$  was first infected in year  $j$  is

$$v_{ij|y} = \begin{cases} \frac{A}{N_{i|y}} & y \geq i + 12 \\ \frac{A(\prod_{k=1}^{j-1}(1-A))}{N_{i|y}} & y < i + 12 \end{cases} \quad (21)$$

where  $N_{i|y}$  is a normalizing factor that enforces the assumption that all individuals have their first infection by age 12 and ensures that all probabilities sum to one for individuals that are  $\geq 12$  years old at the observation date. The normalization factor does not apply to individuals that are  $< 12$  years old, who have some probability of being naive to infection. We combine the probabilities of the age of first infection with annual historical influenza A subtype frequency data (section S2.7) to determine the probability that an individual with birth year  $i$  had his or her first exposure to subtype  $S$  in year  $j$ :

$$p_{\text{imp}_{S,i|y}} = \sum_{j=i}^y f_{S|j} v_{i,j|y}. \quad (22)$$

Here,  $f_{S|j}$  gives the fraction of specimens of subtype  $S$  out of all specimens from community surveillance that are positive for influenza A. For individuals younger than 12 years old during the year of observation, the probability that an individual was naive in observation year  $y$  is

$$p_{\text{naive}_{i|y}} = 1 - \sum_{j=i}^y v_{i,j|y}. \quad (23)$$

## Code availability

All of the software to run the analysis and produce the figures is available at <https://github.com/cobeylab/Influenza-immune-dynamics>.

## Data availability

The data for this study are available at <https://github.com/cobeylab/Influenza-immune-dynamics>.

## Acknowledgements

We are grateful to Phil Arevalo for helpful discussions. We thank the University of Chicago Resource Computing Center for access to high performance computing. This project has been funded in whole or in part with federal funds from the National Institute of Allergy and Infectious Diseases (NIAID), National Institutes of Health (NIH), Department of Health and Human Services, under grant DP2AI117921 (to SC) and CEIRS Contract No. HHSN272201400005C (to SC). The household cohort study was supported by the Research Fund for the Control of Infectious Diseases of the Health, Welfare and Food Bureau of the Hong Kong SAR Government (grant numbers CHP-CE-03, 11100882 and 13120602), the Area of Excellence Scheme of the Hong Kong University Grants Committee (grant number AoE/M-12/06), and the Hong Kong Research Grants Council (grant no. T11-705/14N). Funding was also provided by NIH F30AI124636 to S.R., NIH T32GM007281, and NIGMS grant no. U54GM088558. The funders had no role in study design, data collection and analysis, decision to publish, or preparation of the manuscript.

## Author contributions

S.R., R.S., B.J.C., and S.C. designed the research; S.R. and R.S. performed the analysis; V.J.F., G.M.L., D.K.M., R.A.P.M.P., J.S.M., and B.J.C. provided data and epidemiological expertise; S.R., B.J.C., and S.C. wrote the manuscript. All authors contributed to critical review of the manuscript.

## Competing interests

B.J.C. has received research funding from Sanofi, and honoraria from Sanofi and Roche.

## Materials and correspondence

Sylvia Ranjeva, [slr@uchicago.edu](mailto:slr@uchicago.edu)

## References

- [1] D. C. Wiley, I. A. Wilson, and J. J. Skehel. Structural identification of the antibody-binding sites of Hong Kong influenza haemagglutinin and their involvement in antigenic variation. *Nature*, 289(5796):373–378, 1 1981.
- [2] Andrew J. Caton, George G. Brownlee, Jonathan W. Yewdell, and Walter Gerhard. The antigenic structure of the influenza virus A/PR/8/34 hemagglutinin (H1 subtype). *Cell*, 31(2):417–427, 12 1982.
- [3] Xiacong Yu, Tshidi Tsibane, Patricia A McGraw, Frances S House, Christopher J Keefer, Mark D Hicar, Terrence M Tumpey, Claudia Pappas, Lucy A Perrone, Osvaldo Martinez, James Stevens, Ian A Wilson, Patricia V Aguilar, Eric L Altschuler, Christopher F Basler, James E Crowe, and Jr. Neutralizing antibodies derived from the B cells of 1918 influenza pandemic survivors. *Nature*, 455(7212):532–6, 9 2008.
- [4] Kathy Hancock, Vic Veguilla, Xihua Lu, Weimin Zhong, Ebonee N. Butler, Hong Sun, Feng Liu, Libo Dong, Joshua R. DeVos, Paul M. Gargiullo, T. Lynnette Brammer, Nancy J. Cox, Terrence M. Tumpey, and Jacqueline M. Katz. Cross-Reactive Antibody Responses to the 2009 Pandemic H1N1 Influenza Virus. *New England Journal of Medicine*, 361(20):1945–1952, 11 2009.
- [5] Claudia Maria Trombetta and Emanuele Montomoli. Influenza immunology evaluation and correlates of protection: a focus on vaccines. *Expert Review of Vaccines*, 15(8):967–976, 8 2016.
- [6] D Hobson, R L Curry, A S Beare, and A Ward-Gardner. The role of serum haemagglutination-inhibiting antibody in protection against challenge infection with influenza A2 and B viruses. *The Journal of Hygiene (London)*, 70(4):767–77, 12 1972.

- [7] Laurent Coudeville, Fabrice Bailleux, Benjamin Riche, Françoise Megas, Philippe Andre, and Rene Ecochard. Relationship between haemagglutination- inhibiting antibody titres and clinical protection against influenza: development and application of a bayesian random-effects model. *BMC Medical Research Methodology*, 10(18):18, 12 2010.
- [8] Hsiang-Yu Yuan, Marc Baguelin, Kin O. Kwok, Nimalan Arinaminpathy, Edwin van Leeuwen, and Steven Riley. The impact of stratified immunity on the transmission dynamics of influenza. *Epidemics*, 20(2017):84–93, 3 2017.
- [9] Steven Black, Uwe Nicolay, Timo Vesikari, Markus Knuf, Giuseppe Del Giudice, Giovanni Della Cioppa, Theodore Tsai, Ralf Clemens, and Rino Rappuoli. Hemagglutination Inhibition Antibody Titers as a Correlate of Protection for Inactivated Influenza Vaccines in Children. *The Pediatric Infectious Disease Journal*, 30(12):1081–1085, 12 2011.
- [10] Adam J. Kucharski, Justin Lessler, Jonathan M. Read, Huachen Zhu, Chao Qiang Jiang, Yi Guan, Derek A. T. Cummings, and Steven Riley. Estimating the Life Course of Influenza A(H3N2) Antibody Responses from Cross-Sectional Data. *PLOS Biology*, 13(3):e1002082, 3 2015.
- [11] Simon Cauchemez, Peter Horby, Annette Fox, Le Quynh Mai, Le Thi Thanh, Pham Quang Thai, Le Nguyen Minh Hoa, Nguyen Tran Hien, and Neil M. Ferguson. Influenza Infection Rates, Measurement Errors and the Interpretation of Paired Serology. *PLoS Pathogens*, 8(12):e1003061, 12 2012.
- [12] Xiahong Zhao, Yilin Ning, Mark Chen, and Alex R. Cook. Individual and population trajectories of influenza antibody titers over multiple seasons in tropical Singapore. *American Journal of Epidemiology*, 6 2017.
- [13] Adam Kucharski, Justin Lessler, Derek Cummings, and Steven Riley. Timescales of influenza A/H3N2 antibody dynamics. *bioRxiv*, page 183111, 11 2017.
- [14] Benjamin J Cowling, Kwok Hung Chan, Vicky J Fang, Lincoln L H Lau, Hau Chi So, Rita O P Fung, Edward S K Ma, Alfred S K Kwong, Chi-Wai Chan, Wendy W S Tsui, Ho-Yin Ngai, Daniel W S Chu, Paco W Y Lee, Ming-Chee Chiu, Gabriel M Leung, and Joseph S M Peiris. Comparative epidemiology of pandemic and seasonal influenza A in households. *The New England Journal of Medicine*, 362(23):2175–2184, 6 2010.
- [15] B. J. Cowling, R. A. P. M. Perera, V. J. Fang, K.-H. Chan, W. Wai, H. C. So, D. K. W. Chu, J. Y. Wong, E. Y. Shiu, S. Ng, D. K. M. Ip, J. S. M. Peiris, and G. M. Leung. Incidence of Influenza Virus Infections in Children in Hong Kong in a 3-Year Randomized Placebo-Controlled Vaccine Study, 2009–2012. *Clinical Infectious Diseases*, 59(4):517–524, 8 2014.
- [16] Justin Lessler, Steven Riley, Jonathan M. Read, Shuying Wang, Huachen Zhu, Gavin J. D. Smith, Yi Guan, Chao Qiang Jiang, and Derek A. T. Cummings. Evidence for Antigenic Seniority in Influenza A (H3N2) Antibody Responses in Southern China. *PLoS Pathogens*, 8(7):e1002802, 7 2012.
- [17] Raffael Nachbagauer, Angela Choi, Ruvim Izikson, Manon M. Cox, Peter Palese, and Florian Krammer. Age Dependence and Isotype Specificity of Influenza Virus Hemagglutinin Stalk-Reactive Antibodies in Humans. *mBio*, 7(1):01996–15, 2016.
- [18] Yao-Qing Chen, Teddy John Wohlbold, Nai-Ying Zheng, Min Huang, Yunping Huang, Karlynn E. Neu, Jiwon Lee, Hongquan Wan, Karla Thatcher Rojas, Ericka Kirkpatrick, Carole Henry, Anna-Karin E. Palm, Christopher T. Stamper, Linda Yu-Ling Lan, David J. Topham, John Treanor, Jens Wrammert, Rafi Ahmed, Maryna C. Eichelberger, George Georgiou, Florian Krammer, and Patrick C. Wilson. Influenza Infection in Humans Induces Broadly Cross-Reactive and Protective Neuraminidase-Reactive Antibodies. *Cell*, 173(2):417–429, 4 2018.
- [19] F M Davenport, Hennessy A V, T Francis, and P Fabisch. Epidemiologic and immunologic significance of age distribution of antibody to antigenic variants of influenza virus. *The Journal of Experimental Medicine*, 98(6):641–56, 12 1953.
- [20] F. M. Davenport, A. V. Hennessy, C. H. Stuart-Harris, and T. Francis. Epidemiology of Influenza. Comparative Serological Observations in England and the United States. *Lancet*, pages 469–74, 1955.
- [21] K M Sullivan, A S Monto, and I M Longini. Estimates of the US health impact of influenza. *American journal of public health*, 83(12):1712–6, 12 1993.
- [22] Jerome I Tokars, Sonja J Olsen, and Carrie Reed. Seasonal Incidence of Symptomatic Influenza in the United States. *Clinical Infectious Diseases*, 66(10):1511–1518, 5 2018.



- [23] Katelyn M Gostic, Monique Ambrose, Michael Worobey, and James O Lloyd-Smith. Potent protection against H5N1 and H7N9 influenza via childhood hemagglutinin imprinting. *Science*, 354(6313):722–726, 11 2016.
- [24] Alain Gagnon, Enrique Acosta, Stacey Hallman, Robert Bourbeau, Lisa Y Dillon, Nadine Ouellette, David J D Earn, D Ann Herring, Kris Inwood, Joaquin Madrenas, and Matthew S Miller. Pandemic Paradox: Early Life H2N2 Pandemic Influenza Infection Enhanced Susceptibility to Death during the 2009 H1N1 Pandemic. *mBio*, 9(1):02091–17, 1 2018.
- [25] Edward Goldstein, Sarah Cobey, Saki Takahashi, Joel C. Miller, and Marc Lipsitch. Predicting the Epidemic Sizes of Influenza A/H1N1, A/H3N2, and B: A Statistical Method. *PLoS Medicine*, 8(7):e1001051, 7 2011.
- [26] T. Sonoguchi, H. Naito, M. Hara, Y. Takeuchi, and H. Fukumi. Cross-Subtype Protection in Humans During Sequential, Overlapping, and/or Concurrent Epidemics Caused by H3N2 and H1N1 Influenza Viruses. *Journal of Infectious Diseases*, 151(1):81–88, 1 1985.
- [27] M. L. B. Hillaire, S. E. van Trierum, J. H. C. M. Kreijtz, R. Bodewes, M. M. Geelhoed-Mieras, N. J. Nieuwkoop, R. A. M. Fouchier, T. Kuiken, A. D. M. E. Osterhaus, and G. F. Rimmelzwaan. Cross-protective immunity against influenza pH1N1 2009 viruses induced by seasonal influenza A (H3N2) virus is mediated by virus-specific T-cells. *Journal of General Virology*, 92(10):2339–2349, 10 2011.
- [28] Judith M. Fonville, Pieter L. A. Fraaij, Gerrie de Mutsert, Samuel H. Wilks, Ruud van Beek, Ron A. M. Fouchier, and Guus F. Rimmelzwaan. Antigenic Maps of Influenza A(H3N2) Produced With Human Antisera Obtained After Primary Infection. *Journal of Infectious Diseases*, 213(1):31–38, 1 2016.
- [29] Sarah Cobey and Scott E Hensley. Immune history and influenza virus susceptibility. *Current Opinion in Virology*, 22:105–111, 2 2017.
- [30] Thomas Jr. Francis. On the Doctrine of Original Antigenic Sin. *Proceedings of the American Philosophical Society*, 104(6):572–578, 1960.
- [31] Fazekas de St Groth and R G Webster. Disquisitions of Original Antigenic Sin. I. Evidence in man. *The Journal of Experimental Medicine*, 124(3):331–45, 9 1966.
- [32] Jae-Keun Park, Alison Han, Lindsay Czajkowski, Susan Reed, Rani Athota, Tyler Bristol, Luz Angela Rosas, Adriana Cervantes-Medina, Jeffery K Taubenberger, and Matthew J Memoli. Evaluation of Preexisting Anti-Hemagglutinin Stalk Antibody as a Correlate of Protection in a Healthy Volunteer Challenge with Influenza A/H1N1pdm Virus. *mBio*, 9(1):02284–17, 1 2018.
- [33] Matthew S Miller, Thomas J Gardner, Florian Krammer, Lauren C Aguado, Domenico Tortorella, Christopher F Basler, and Peter Palese. Neutralizing antibodies against previously encountered influenza virus strains increase over time: a longitudinal analysis. *Science Translational Medicine*, 5(198):198ra107, 8 2013.
- [34] Jacob Bock Axelsen, Rami Yaari, Bryan T Grenfell, and Lewi Stone. Multiannual forecasting of seasonal influenza dynamics reveals climatic and evolutionary drivers. *PNAS*, 111(26):9538–9542, 2014.
- [35] Xiangjun Du, Aaron A King, Robert J Woods, and Mercedes Pascual. Evolution-informed forecasting of seasonal influenza A (H3N2). *Science Translational Medicine*, 9(413):eaan5325, 10 2017.
- [36] Kristie M Grebe, Jonathan W Yewdell, and Jack R Bennink. Heterosubtypic immunity to influenza A virus: where do we stand? *Microbes and Infection*, 10(9):1024–9, 7 2008.
- [37] J.H.C.M. Kreijtz, R.A.M. Fouchier, and G.F. Rimmelzwaan. Immune responses to influenza virus infection. *Virus Research*, 162(1-2):19–30, 12 2011.
- [38] Benjamin J. Cowling, Sophia Ng, Edward S. K. Ma, Calvin K. Y. Cheng, Winnie Wai, Vicky J. Fang, Kwok-Hung Chan, Dennis K. M. Ip, Susan S. Chiu, J.S. Malik Peiris, and Gabriel M. Leung. Protective Efficacy of Seasonal Influenza Vaccination against Seasonal and Pandemic Influenza Virus Infection during 2009 in Hong Kong. *Clinical Infectious Diseases*, 51(12):1370–1379, 12 2010.

- [39] Annette Fox, Le Quynh Mai, Le Thi Thanh, Marcel Wolbers, Nguyen Le Khanh Hang, Pham Quang Thai, Nguyen Thi Thu Yen, Le Nguyen Minh Hoa, Juliet E. Bryant, Tran Nhu Duong, Dang Dinh Thoang, Ian G. Barr, Heiman Wertheim, Jeremy Farrar, Nguyen Tran Hien, and Peter Horby. Hemagglutination inhibiting antibodies and protection against seasonal and pandemic influenza infection. *Journal of Infection*, 70(2):187–196, 2 2015.
- [40] Andrew J. Dunning. A model for immunological correlates of protection. *Statistics in Medicine*, 25(9):1485–1497, 5 2006.
- [41] Robert M Jacobson, Diane E Grill, Ann L Oberg, Prithish K Tosh, Inna G Ovsyannikova, and Gregory A Poland. Profiles of influenza A/H1N1 vaccine response using hemagglutination-inhibition titers Robert. *Human Vaccines & Immunotherapeutics*, 11(4):961–969, 4 2015.
- [42] G Freeman, R A P M Perera, E Ngan, V J Fang, S Cauchemez, D K M Ip, J S M Peiris, and B J Cowling. Quantifying homologous and heterologous antibody titre rises after influenza virus infection. *Epidemiology and Infection*, 144(11):2306–16, 8 2016.
- [43] Edward L Ionides, C Bretó, and Aaron A King. Inference for nonlinear dynamical systems. *Proceedings of the National Academy of Sciences*, 103(49):18438–18443, 12 2006.
- [44] Clifford M. Hurvich and Chih-Ling Tsai. Regression and Time Series Model Selection in Small Samples. *Biometrika*, 76(2):297, 6 1989.
- [45] E. L. Ionides, C. Breto, J. Park, R. A. Smith, and A. A. King. Monte Carlo profile confidence intervals for dynamic systems. *Journal of The Royal Society Interface*, 14(132):20170126, 2017.
- [46] R Bodewes, G de Mutsert, F R M van der Klis, M Ventresca, S Wilks, D J Smith, M Koopmans, R A M Fouchier, A D M E Osterhaus, and G F Rimmelzwaan. Prevalence of antibodies against seasonal influenza A and B viruses in children in Netherlands. *Clinical and Vaccine Immunology*, 18(3):469–76, 3 2011.
- [47] Andreas Sauerbrei, R. Schmidt-Ott, H. Hoyer, and P. Wutzler. Seroprevalence of influenza A and B in German infants and adolescents. *Medical Microbiology and Immunology*, 198(2):93–101, 5 2009.
- [48] A Sauerbrei, T Langenhan, A Brandstädt, R Schmidt-Ott, A Krumbholz, H Girschick, H Huppertz, P Kaiser, J Liese, A Streng, T Niehues, J Peters, A Sauerbrey, H Schrotten, T Tenenbaum, S Wirth, and P Wutzler. Prevalence of antibodies against influenza A and B viruses in children in Germany, 2008 to 2010. *Eurosurveillance*, 19(5):20687, 2 2014.
- [49] Kathy Leung, Mark Jit, Eric H. Y. Lau, and Joseph T. Wu. Social contact patterns relevant to the spread of respiratory infectious diseases in Hong Kong. *Scientific Reports*, 7(1):7974, 2017.
- [50] Anthony E Fiore, David K Shay, Karen Broder, John K Iskander, Timothy M Uyeki, Gina Mootrey, Joseph S Bresee, Nancy S Cox, Centers for Disease Control and Prevention (CDC), and Advisory Committee on Immunization Practices (ACIP). Prevention and control of influenza: recommendations of the Advisory Committee on Immunization Practices (ACIP), 2008. *MMWR. Recommendations and reports : Morbidity and mortality weekly report. Recommendations and reports*, 57(RR-7):1–60, 8 2008.
- [51] SE Ohmit, JG Petrie, and RT Cross. Influenza hemagglutination-inhibition antibody titer as a correlate of vaccine-induced protection. *The Journal of Infectious Diseases*, 204(12):1879–1885, 2011.
- [52] V. Marmara, A. Cook, and A. Kleczkowski. Estimation of force of infection based on different epidemiological proxies: 2009/2010 Influenza epidemic in Malta. *Epidemics*, 9:52–61, 12 2014.
- [53] Tim K. Tsang, Simon Cauchemez, Ranawaka A. P. M. Perera, Guy Freeman, Vicky J. Fang, Dennis K. M. Ip, Gabriel M. Leung, Joseph Sriyal Malik Peiris, and Benjamin J. Cowling. Association Between Antibody Titers and Protection Against Influenza Virus Infection Within Households. *The Journal of Infectious Diseases*, 210(5):684–692, 9 2014.
- [54] Edwin D Kilbourne. Influenza pandemics of the 20th century. *Emerging infectious diseases*, 12(1):9–14, 1 2006.
- [55] Yuelong Shu and John McCauley. GISAID: Global initiative on sharing all influenza data - from vision to reality. *Eurosurveillance*, 22(13):30494, 3 2017.
- [56] Antoine Flahault, Valentina Dias-Ferrao, Philippe Chaberty, Karin Esteves, Alain-Jacques Valleron, and Daniel Lavanchy. FluNet as a Tool for Global Monitoring of Influenza on the Web. *JAMA*, 280(15):1330, 10 1998.

## Supporting Information (SI)

| Subtype   |          | Model       | Log likelihood (SE) | $\Delta$ AICc |
|-----------|----------|-------------|---------------------|---------------|
| H1N1pdm09 | Adults   | with $k$    | -79.5 (0.06)        | 0             |
|           |          | without $k$ | -81.7 (0.03)        | 2.1           |
|           | Children | with $k$    | -91.8 (0.01)        | 0             |
|           |          | without $k$ | -95.9 (0.04)        | 5.6           |
| H3N2      | Adults   | with $k$    | -45.5 (0.04)        | 0             |
|           |          | without $k$ | -48.6 (0.03)        | 3.6           |
|           | Children | with $k$    | -77.8 (0.07)        | 0             |
|           |          | without $k$ | -85.5 (0.05)        | 13.0          |

**Table S1:** Model comparisons for sub-model of short-term boosting. Models “with  $k$ ” include the antibody ceiling effect (Eq. 9, section S1.1), and models “without  $k$ ” do not ( $k_{a,s} = 0$ ).

| Subtype   |          | Epidemic | Simulated incidence | From observed $\geq$ 4-fold changes |
|-----------|----------|----------|---------------------|-------------------------------------|
| H1N1pdm09 | Adults   | 1        | 0.04 [0.02, 0.05]   | 0.05                                |
|           |          | 2        | 0.08 [0.07, 0.11]   | 0.12                                |
|           |          | 3        | 0.04 [0.03, 0.05]   | 0.06                                |
|           | Children | 1        | 0.08 [0.03, 0.13]   | 0.10                                |
|           |          | 2        | 0.17 [0.10, 0.21]   | 0.19                                |
|           |          | 3        | 0.06 [0.02, 0.10]   | 0.06                                |
| H3N2      | Adults   | 1        | 0.17 [0.14, 0.19]   | 0.16                                |
|           |          | 2        | 0.19 [0.16, 0.22]   | 0.15                                |
|           |          | 3        | 0.05 [0.03, 0.06]   | 0.03                                |
|           | Children | 1        | 0.24 [0.17, 0.30]   | 0.21                                |
|           |          | 2        | 0.24 [0.17, 0.32]   | 0.24                                |
|           |          | 3        | 0.05 [0.02, 0.10]   | 0.03                                |

**Table S2:** Incidence in each epidemic (Fig. 3). The simulated incidence was estimated from the latent simulated infections. The main and bracketed values give the median and 95% quantiles, respectively, from 1000 replicate simulations of the models at the maximum likelihood estimate. Incidence was also estimated from the frequency of  $\geq$  4-fold titer consecutive titer rises observed in the data.

| Infecting Subtype | Imprinting Group | Parameter                         | Population subset | MLE [95% CI]   |
|-------------------|------------------|-----------------------------------|-------------------|----------------|
| H1N1pdm09         | Group 1          | $(\alpha_{\text{imp,H1N1pdm09}})$ | Ages 35 - 50 y    | 1.0 [0.6, 1.8] |
| H3N2              | Group 2          | $(\alpha_{\text{imp,H3N2}})$      | Ages 35 - 50 y    | 0.8 [0.4, 1.2] |

**Table S3:** Maximum likelihood estimates of the group-level imprinting effects ( $\alpha_{\text{imp,H1N1pdm09}}$  and  $\alpha_{\text{imp,H3N2}}$ ) among individuals ages 35-50 y, with 95% confidence intervals (CIs).

| Parameter                                      | Notation                            | Type             | Value                                                                                                                                                            |
|------------------------------------------------|-------------------------------------|------------------|------------------------------------------------------------------------------------------------------------------------------------------------------------------|
| Magnitude of short-term boost                  | $d_{\text{children},s}$             | Estimated        |                                                                                                                                                                  |
| Variability of short-term boost                | $d_{\text{adults},s}$               | (sub-model)      |                                                                                                                                                                  |
| Antibody ceiling effect                        | $\sigma_{\text{children},s}$        | Estimated        |                                                                                                                                                                  |
|                                                | $\sigma_{\text{adults},s}$          | (sub-model)      |                                                                                                                                                                  |
| Magnitude of long-term boost                   | $k_{\text{children},s}$             | Estimated        |                                                                                                                                                                  |
| 50% protective titer ( $TP50$ )                | $k_{\text{adults},s}$               | (sub-model)      |                                                                                                                                                                  |
|                                                | $\zeta_{\text{children},s}$         | Estimated        |                                                                                                                                                                  |
|                                                | $\zeta_{\text{adults},s}$           | Estimated        |                                                                                                                                                                  |
| Waning rate of non-HI-correlated immunity      | $TP50_{\text{children},s}$          | Estimated        |                                                                                                                                                                  |
| Waning rate heterosubtypic                     | $TP50_{\text{adults},s}$            | Estimated        |                                                                                                                                                                  |
| Scaled transmission rate                       | $w_{\text{nonspecific,children},s}$ | Estimated        |                                                                                                                                                                  |
| Age category-specific contact rate             | $w_{\text{nonspecific,adults},s}$   | Estimated        |                                                                                                                                                                  |
|                                                | $w_{\text{nonspecific},m}$          | Estimated        |                                                                                                                                                                  |
|                                                | $\beta_{\text{scaled},s}$           | Estimated        |                                                                                                                                                                  |
|                                                | $\beta_{c,cat_i}$                   | Fixed            | Age 0-10: 7.7 d <sup>-1</sup> [49]<br>11-20 y: 7.3 d <sup>-1</sup><br>21-40 y: 5.7 d <sup>-1</sup><br>41-65 y: 5.7 d <sup>-1</sup><br>>65 y: 4.2 d <sup>-1</sup> |
| Infection duration                             | $\Gamma(\mu, \sigma_{\text{dur}})$  | Fixed            | $\mu = 5$ d, $\sigma_{\text{dur}} = 1$ d [50]                                                                                                                    |
| Rate of short-term titer rise                  | $r$                                 | Fixed            | 0.2 d <sup>-1</sup> [12]                                                                                                                                         |
| Duration: infection to peak titer              | $T_{\text{peak}}$                   | Fixed            | 4 wks [12]                                                                                                                                                       |
| Rate of short-term titer waning                | $w$                                 | Fixed            | 0.008 d <sup>-1</sup> [12, 8]                                                                                                                                    |
| Scaling parameter of antibody protection curve | $\phi$                              | Fixed            | 2.1 [7]                                                                                                                                                          |
| Measurement error                              | $\epsilon$                          | Fixed            | 1.29 [11, 13]                                                                                                                                                    |
|                                                | $\epsilon_{\text{undetectable}}$    |                  | 0.74 [11]                                                                                                                                                        |
| <b>State variable</b>                          |                                     |                  |                                                                                                                                                                  |
| Titer                                          | $h_{i,s}(t)$                        | Simulated        |                                                                                                                                                                  |
| Baseline titer                                 | $h_{\text{baseline},i,s}(0)$        | Fixed with error |                                                                                                                                                                  |
| Susceptibility                                 | $q_{i,s}(t)$                        | Simulated        |                                                                                                                                                                  |
| Time of infection                              | $t_{i,s}^X$                         | Simulated        |                                                                                                                                                                  |

**Table S4:** Model parameters and state variables.

| Subtype   |          | Parameter        | MLE [95% CI]   |
|-----------|----------|------------------|----------------|
| H1N1pdm09 | Adults   | $d_{a,i,s}$      | 3.6 [2.4,5.2]  |
|           |          | $\sigma_{a,i,s}$ | 1.9 [1.4, 2.6] |
|           |          | $k_{a,i,s}$      | 0.3 [0.1, 1.8] |
|           | Children | $d_{a,i,s}$      | 3.5 [3.3, 5.5] |
|           |          | $\sigma_{a,i,s}$ | 0.9 [0.7, 1.3] |
|           |          | $k_{a,i,s}$      | 0.6 [0.3, 1.2] |
| H3N2      | Adults   | $d_{a,i,s}$      | 4.6 [3.1, 7.1] |
|           |          | $\sigma_{a,i,s}$ | 1.4 [0.9, 2.3] |
|           |          | $k_{a,i,s}$      | 1.0 [0.6, 2.5] |
|           | Children | $d_{a,i,s}$      | 5.1 [3.9,7.2]  |
|           |          | $\sigma_{a,i,s}$ | 1.5 [1.0, 2.2] |
|           |          | $k_{a,i,s}$      | 0.5 [0.3, 1.0] |

**Table S5:** Maximum likelihood estimates of the parameters that govern the short-term titer dynamics, with 95% confidence intervals (CIs).

| Subtype   |          | % Symptomatic infections | % Primary infections |
|-----------|----------|--------------------------|----------------------|
| H1N1pdm09 | Adults   | 69.4%                    | 38.9%                |
|           | Children | 64.3%                    | 54.8%                |
| H3N2      | Adults   | 76.2%                    | 38.1%                |
|           | Children | 69.0%                    | 75.8%                |

**Table S6:** Fraction of children and adults with symptomatic infections (defined by an ARI in the two weeks prior to PCR-confirmed infection) and primary infections (defined by the absence of infection with or without ARI symptoms in other household members in the two weeks prior to PCR-confirmed infection) for H1N1pdm09 and H3N2. ARI was defined as having least two of the following symptoms: fever  $\geq 37.8^\circ\text{C}$ , cough, sore throat, runny nose, headache, myalgia, and phlegm.

| Subtype   | Parameter                 | MLE [95% CI]      |
|-----------|---------------------------|-------------------|
| H1N1pdm09 | $\beta_{\text{scaled},s}$ | -2.8 [-3.4, -2.2] |
| H3N2      | $\beta_{\text{scaled},s}$ | -3.1 [-3.3, -3.0] |

**Table S7:** Maximum likelihood estimate (log scale) of the subtype-specific scaled transmission rate,  $\beta_{\text{scaled},s}$ , for each subtype, with 95% confidence intervals (CIs).

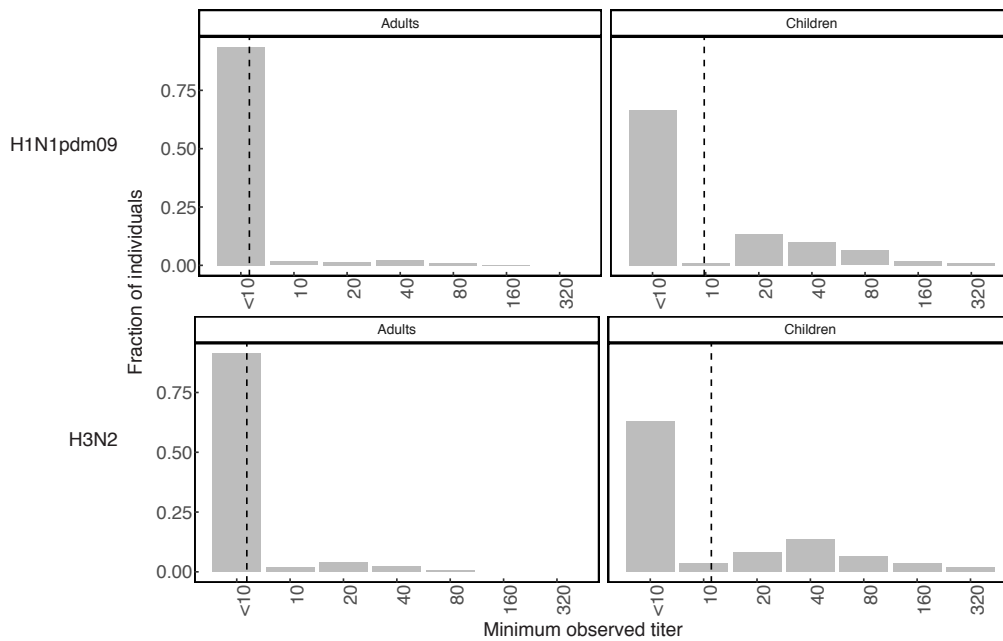

**Figure S1:** Distribution of the minimum observed (baseline) titers in children and adults for H1N1pdm09 and H3N2. The vertical dashed line gives the geometric mean baseline titer.



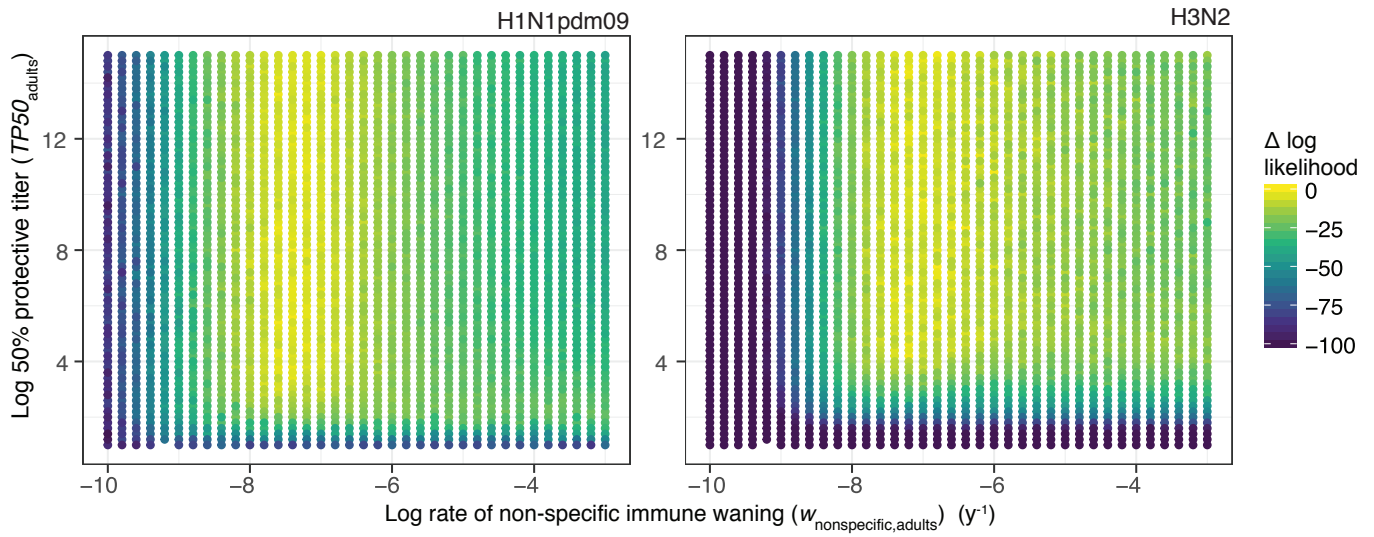

Figure S2: Bivariate likelihood profile of the log  $TP50_{adults}$  and the log rate of non-specific immune waning in adults for H1N1pdm09.

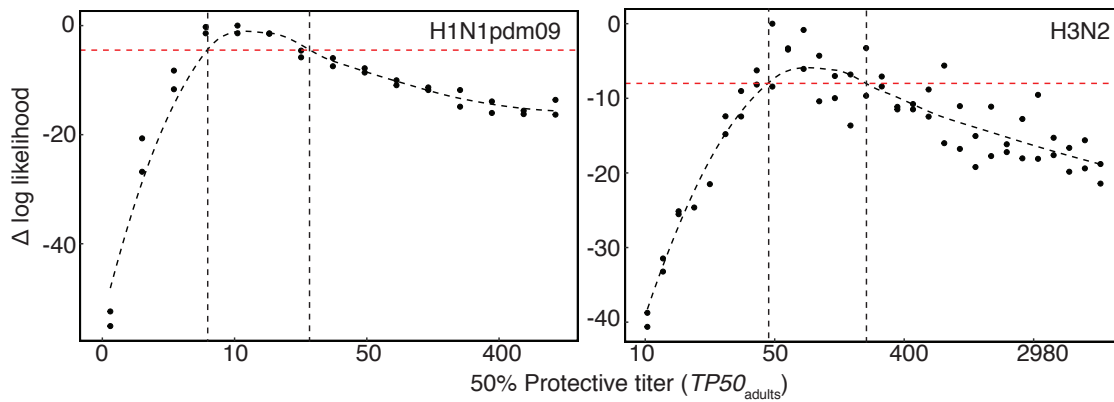

Figure S3: Likelihood profile of the  $TP50_{adults}$  for H1N1pdm09 and H3N2. The red dotted line gives the threshold of 95% significance based on the spline (black dotted line).

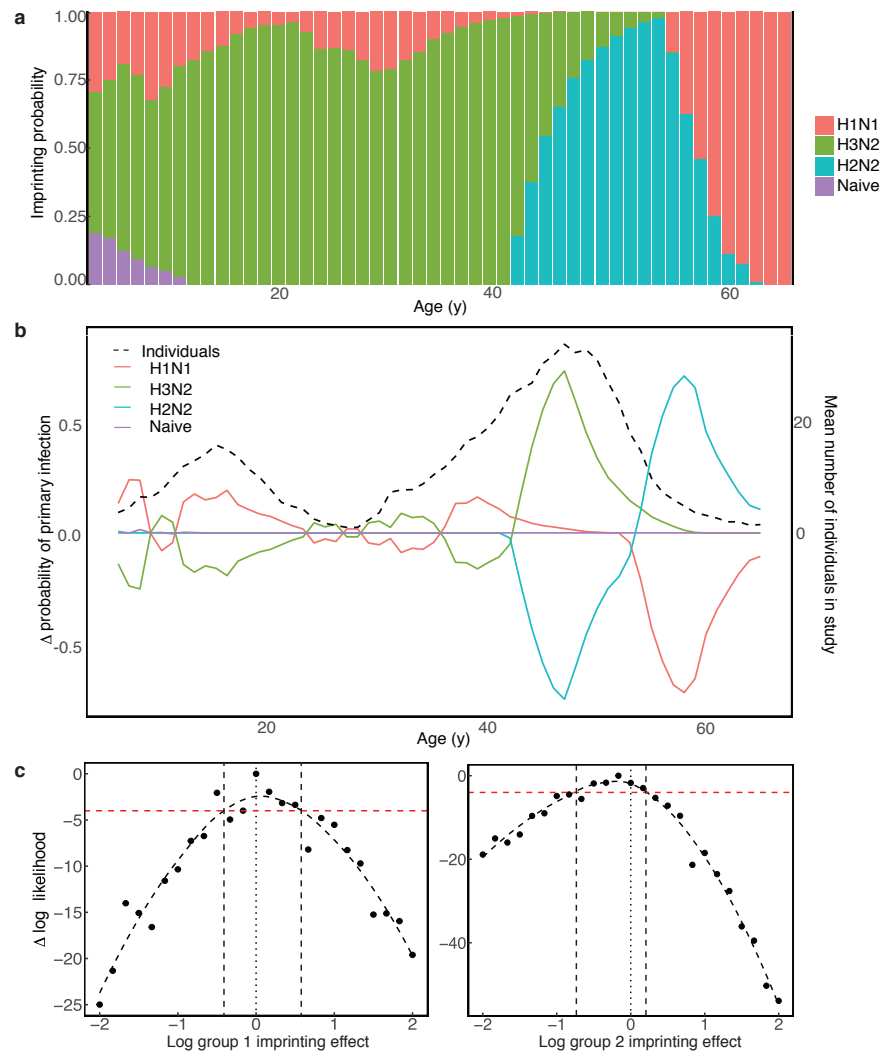

**Figure S4:** **a** Probability of imprinting by historically circulating influenza A subtypes by age in 2009. **b** Change in the mean probability of primary infection with historically-circulating subtypes by age between 2009 and 2014. The black dashed line gives the mean number of individuals by age that were observed in the data between 2009 and 2014. **c** Likelihood profiles for the effect of imprinting by H2N2 on the risk of infection with H1N1pdm09 (left) and the effect of imprinting by H3N2 on the risk of H3N2 infection (right). Values of the log parameter less than 0 (vertical dotted line) indicate a protective imprinting effect. The red dashed horizontal line gives the threshold for statistical significance at a 95% level, and the black dashed lines denote the 95% confidence interval.

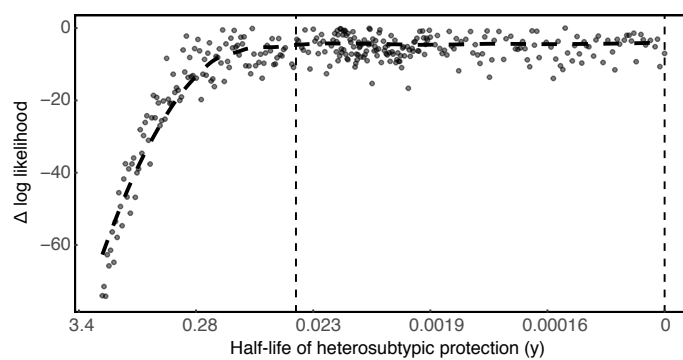

**Figure S5:** Likelihood profile of the rate of waning of heterosubtypic protection. The x-axis gives the corresponding half-life of protection.

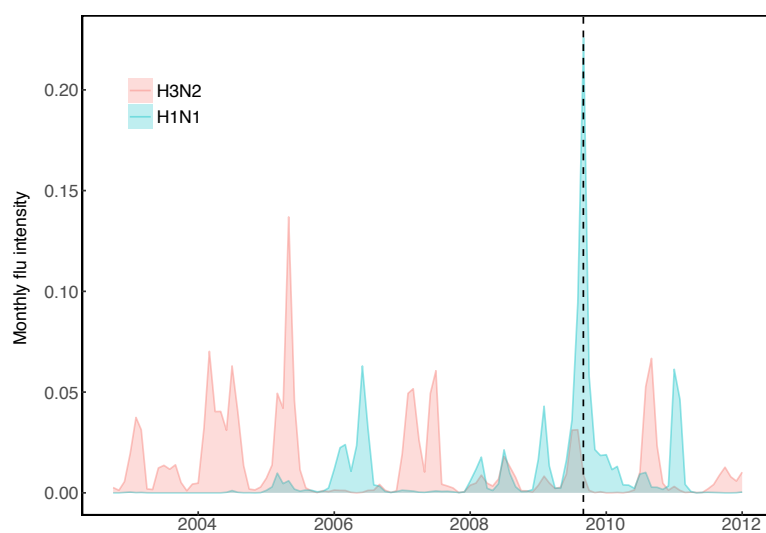

**Figure S6:** Subtype-specific flu intensity ( $ILI \times \% \text{ positive}$ ) in Hong Kong. The black vertical dashed line denotes the earliest observation date in the data.

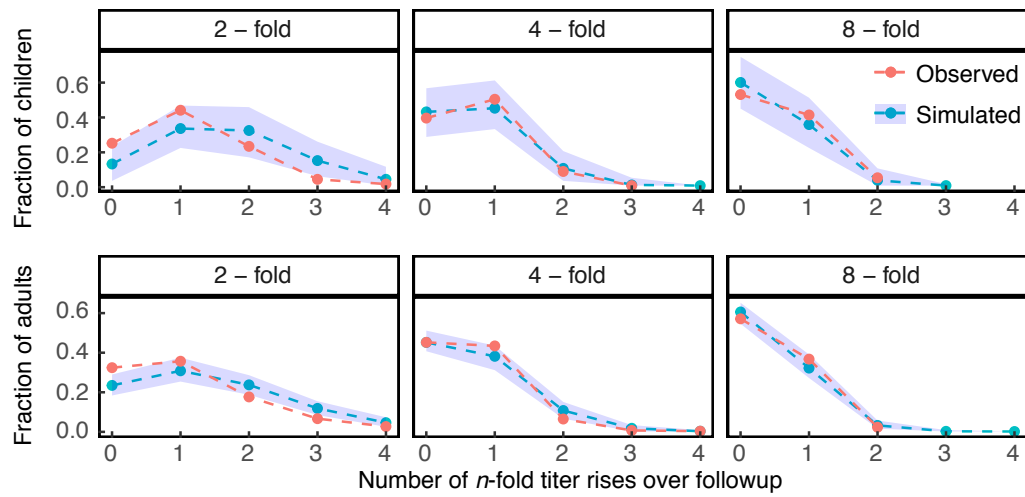

**Figure S7:** Observed and simulated distributions of consecutive 2-, 4-, and 8-fold titer rises per individual in the H3N2 data. The dashed blue lines give the medians from 1000 replicate simulations of the model, and the shaded blue areas are bounded by the 2.5% and 97.5% quantiles.

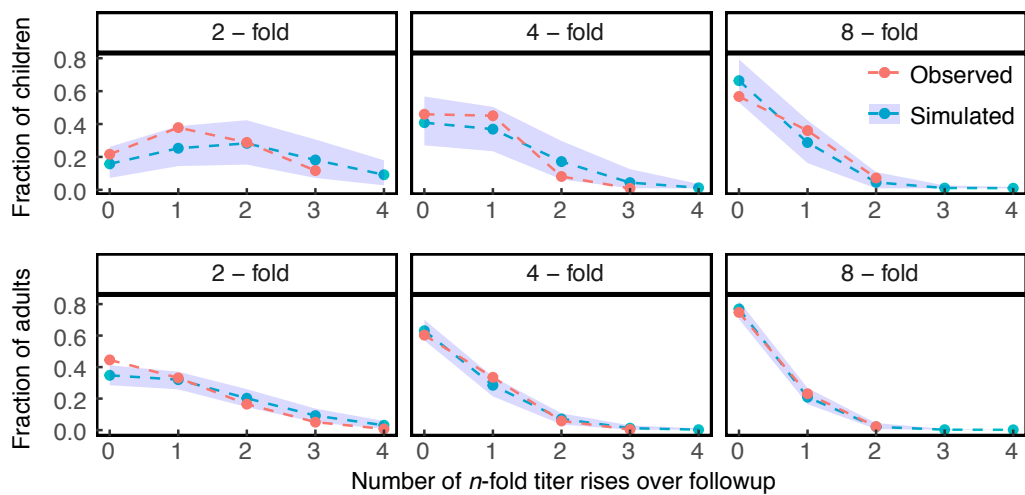

**Figure S8:** Observed and simulated distributions of consecutive 2-, 4-, and 8-fold titer rises per individual in the H1N1pdm09 data. The dashed blue lines give the medians from 1000 replicate simulations of the model, and the shaded blue areas are bounded by the 2.5% and 97.5% quantiles.



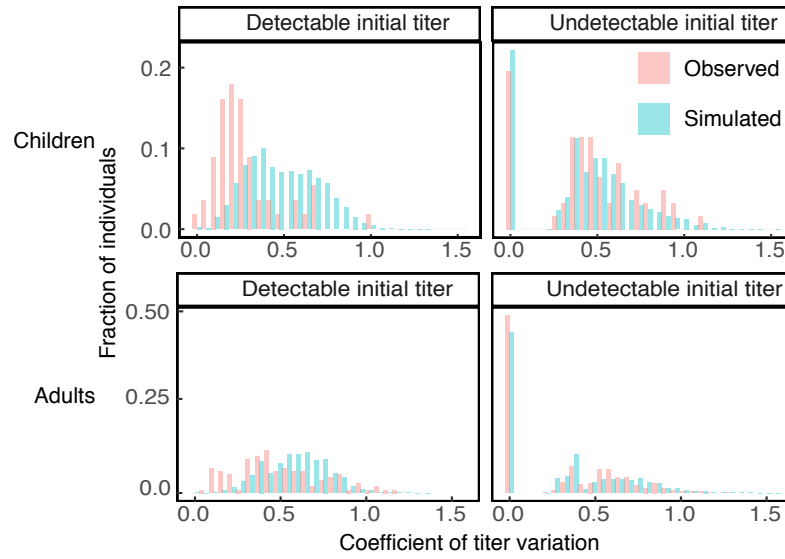

**Figure S9:** Observed and simulated distributions of the coefficients of log titer variation in the H1N1pdm09 data. The distributions are shown for individuals with initial titers  $\geq 10$  (detectable) and for individuals with initial titers  $<10$  (undetectable).

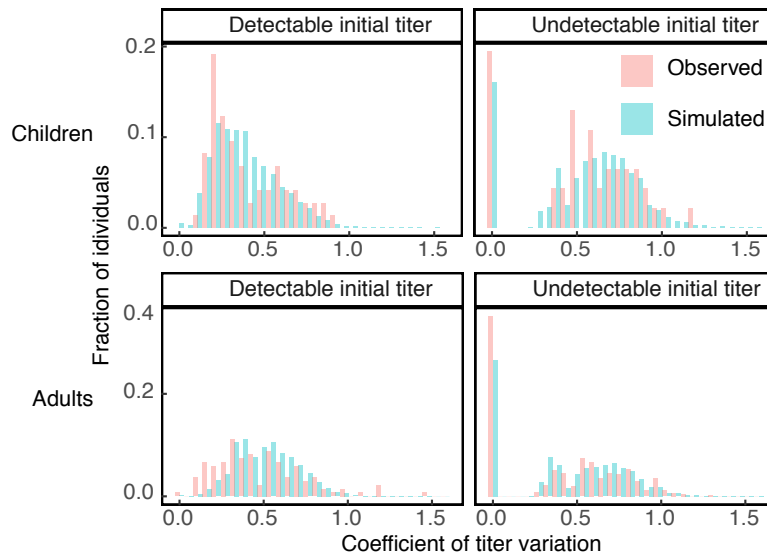

**Figure S10:** Observed and simulated distributions of coefficients of log titer variation in the H3N2 data. The distributions are shown for individuals with initial titers  $\geq 10$  (detectable) and for individuals with initial titers  $<10$  (undetectable).

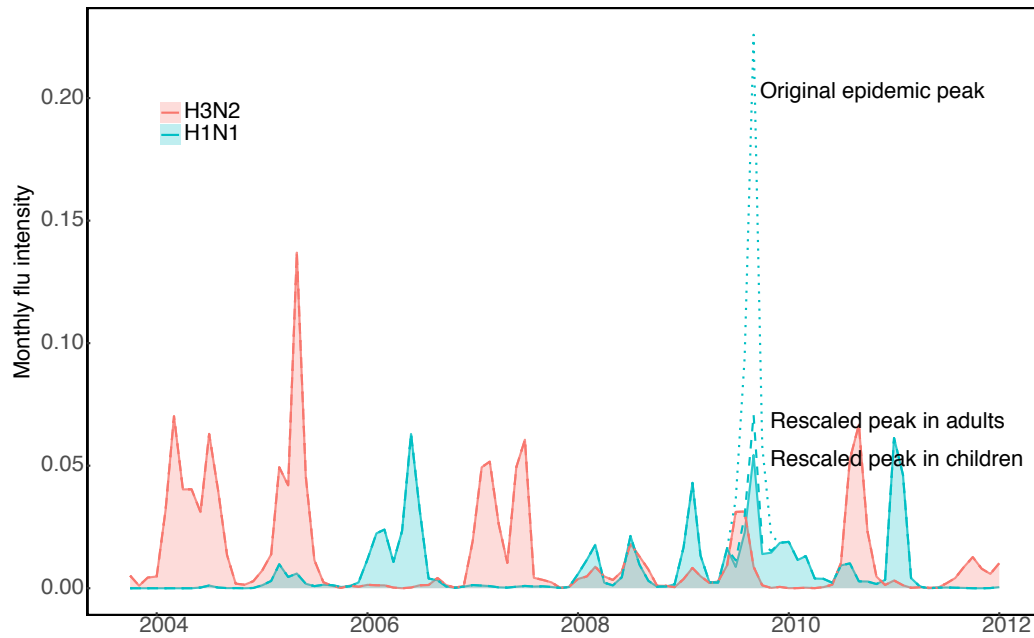

**Figure S11:** Rescaled community intensity of H1N1pdm09 during the 2009 pandemic in adults (dashed blue line) and in children (solid blue line and shading) compared to the original intensity reported by community surveillance (blue dotted line).

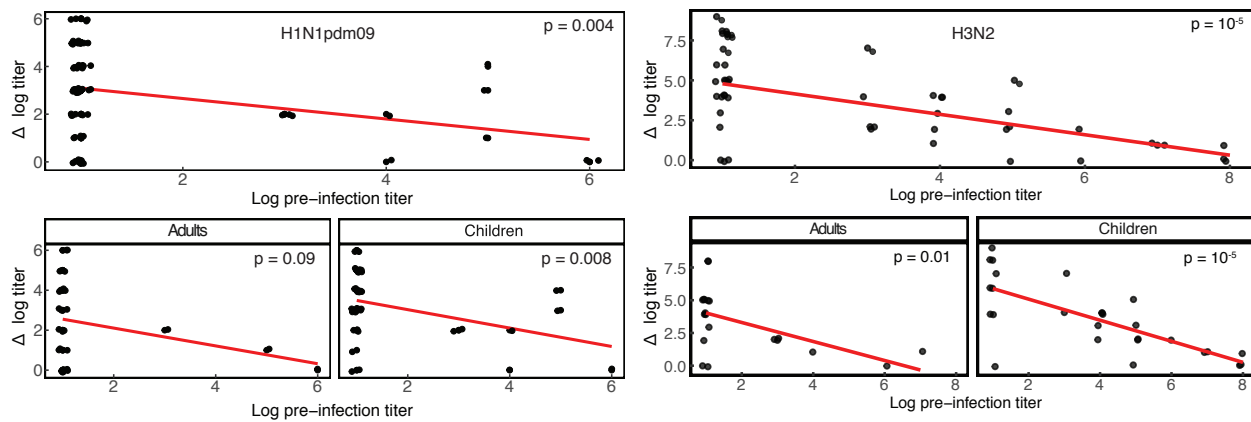

**Figure S12:** Observed titer boost as a function of the pre-infection log titer for individuals with PCR-confirmed infection with H1N1pdm09 (left) and H3N2 (right). Boosts are calculated as the post-infection minus the pre-infection log titer. The top panel for each subtype gives the relationship for aggregated data from children and adults. Note that log titers are defined as in Eq. 17.

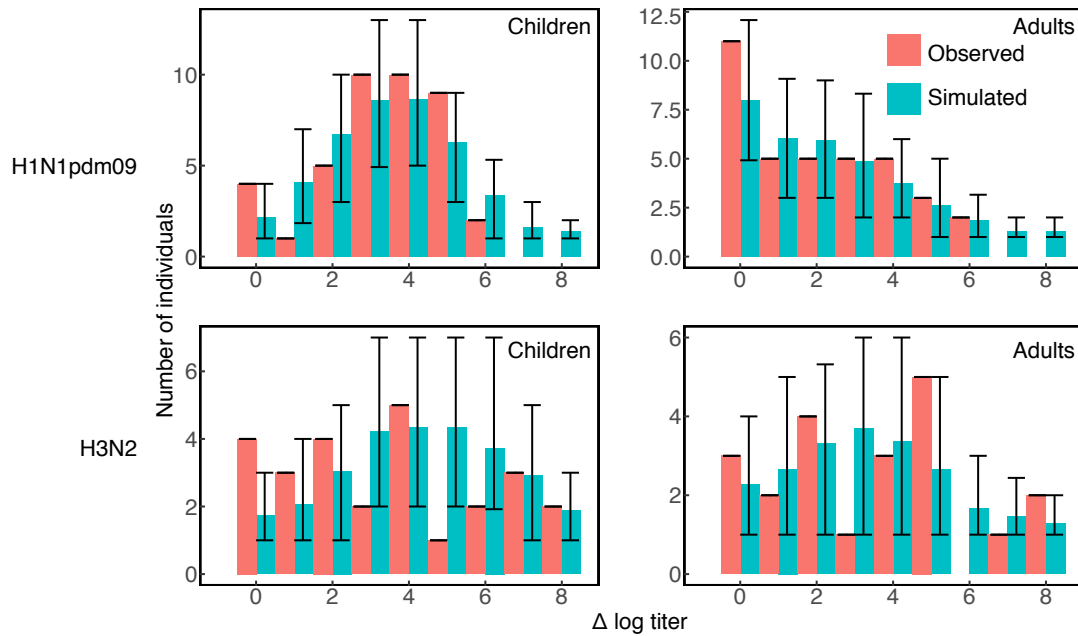

**Figure S13:** Observed and simulated distributions of titer boosts from the sub-model in individuals with PCR-confirmed infections. Boosts are calculated as the post-infection minus the pre-infection log titer. Error bars give the 95% CI among simulations.

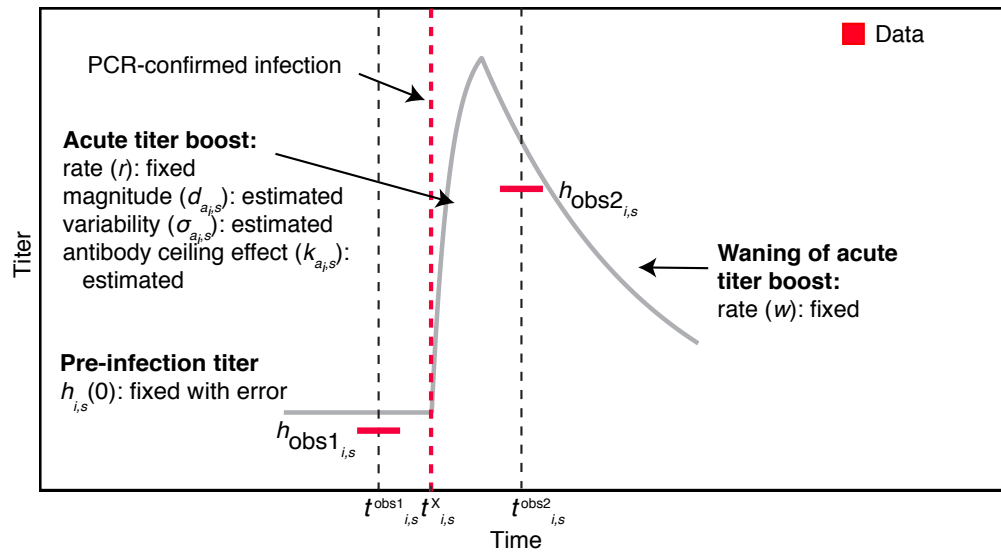

**Figure S14:** Schematic of the acute HI titer dynamics for individual  $i$  against subtype  $s$ , given infection at time  $t_{i,s}^X$ . For the sub-model,  $t_{i,s}^X$  is fixed based on the date of PCR-confirmed infection.

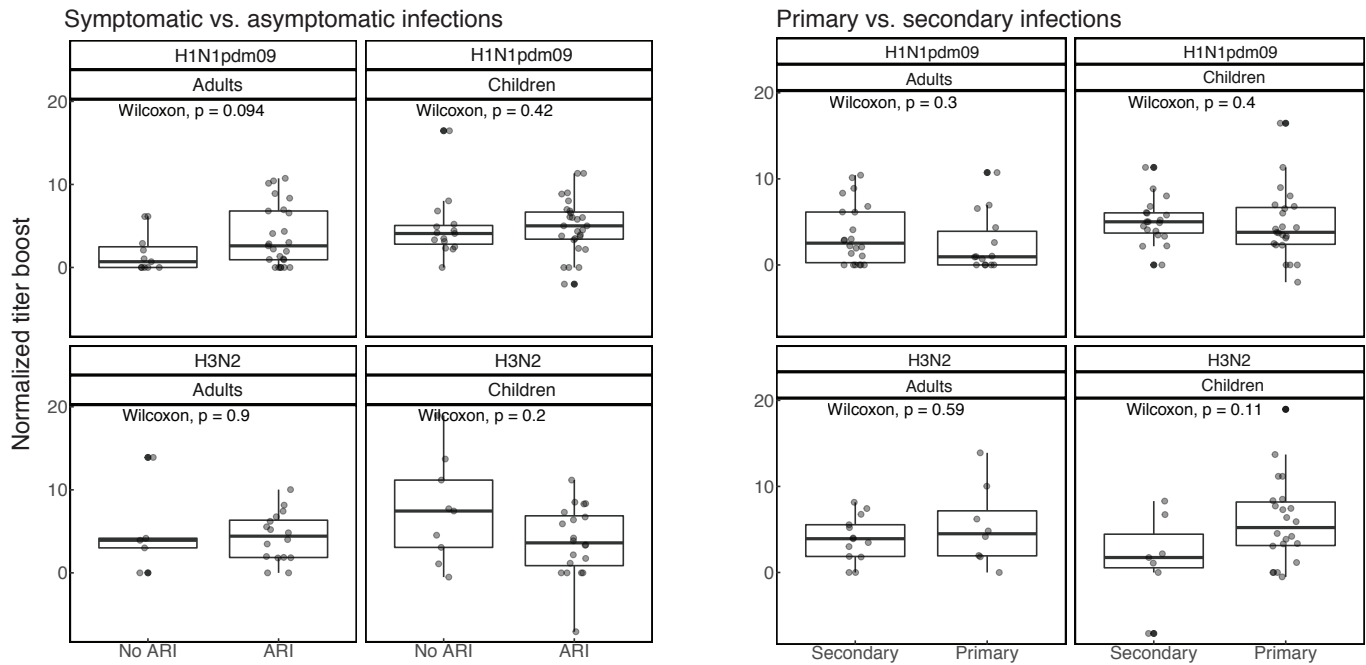

**Figure S15:** Distribution of normalized titer boosts after PCR-confirmed infections for symptomatic and asymptomatic infections (left) and primary and secondary infections (right). Normalized titer boosts are calculated as the log post-infection titer minus the log pre-infection titer divided by the length of time in years between the pre- and post-infection samples. Box plots give the median and interquartile range of the normalized titer boosts, and the individual data points are overlain with horizontal jitter. Differences in the mean of the distributions are determined by non-parametric Wilcoxon tests.

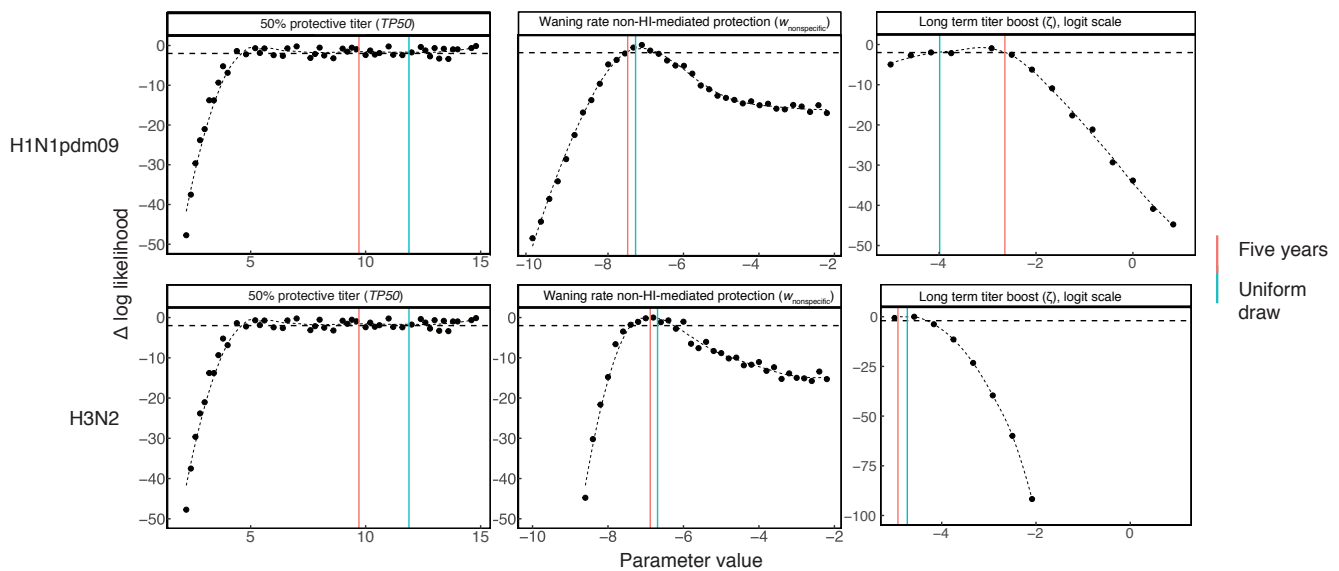

**Figure S16:** Likelihood profiles for the estimated parameters of the best-fit models in adults for H1N1pdm09 and H3N2. The dashed horizontal line gives the threshold for statistical significance at a 95% level. The vertical lines denote the MLEs from models under alternative initial conditions (section S2.3).

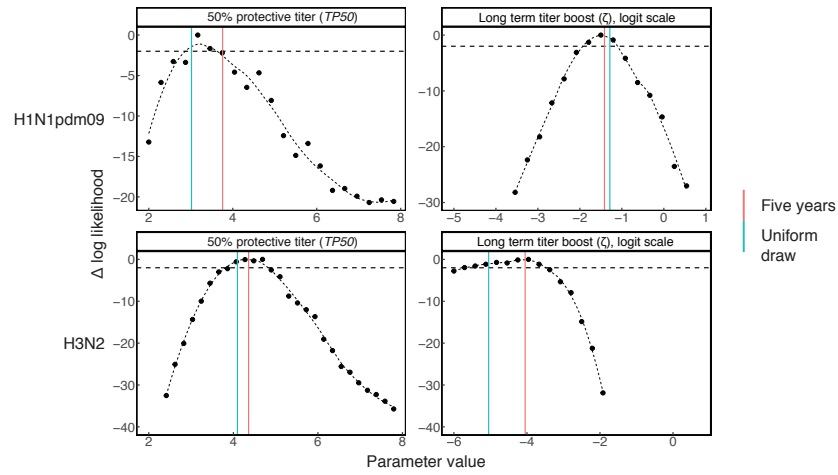

**Figure S17:** Likelihood profiles for the estimated parameters of the best-fit models in **children** for H1N1pdm09 and H3N2. The dashed horizontal line gives the threshold for statistical significance at a 95% level. The vertical lines denote the MLEs from models under alternative initial conditions (section S2.3).

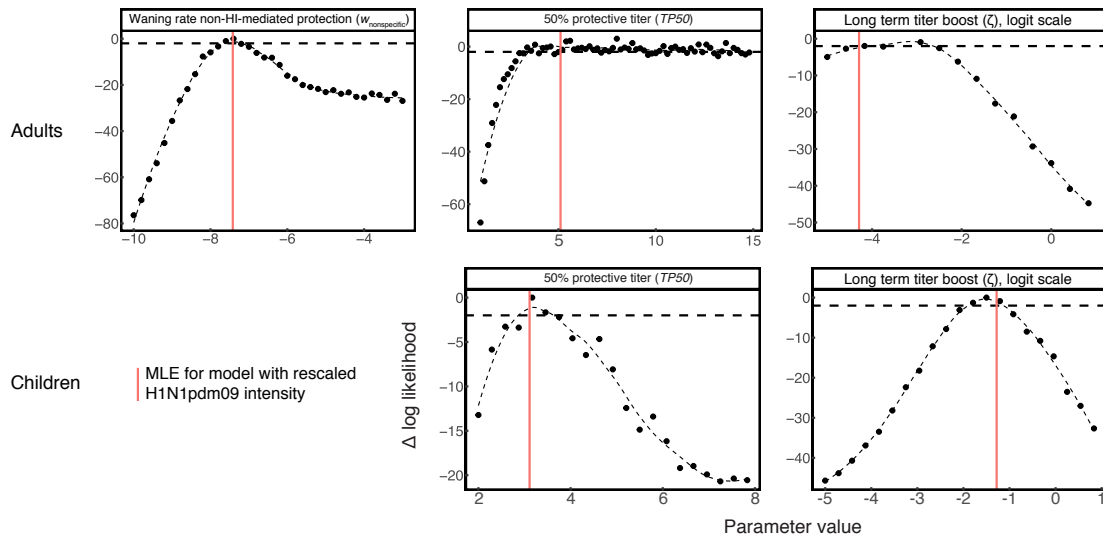

**Figure S18:** Likelihood profiles for the estimated parameters of the best-fit models in adults and children for H1N1pdm09. The dashed horizontal line gives the threshold for statistical significance at a 95% level. The vertical lines denote the MLEs from the model with rescaled H1N1pdm09 intensity during the 2009 pandemic (section S2.4).



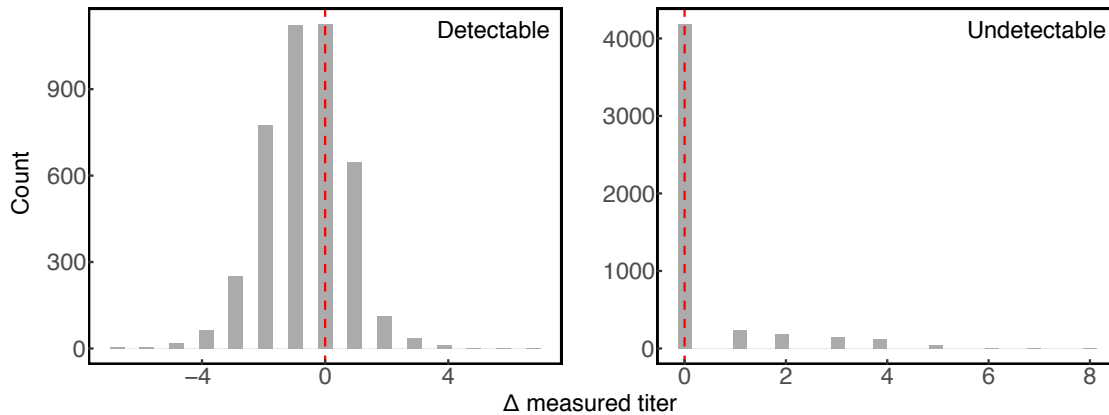

**Figure S19:** Distribution of difference between the second and first measured titer for sera that were tested twice, with distributions shown separately for detectable and undetectable titers based on the initial measurement. The vertical red line marks zero difference.

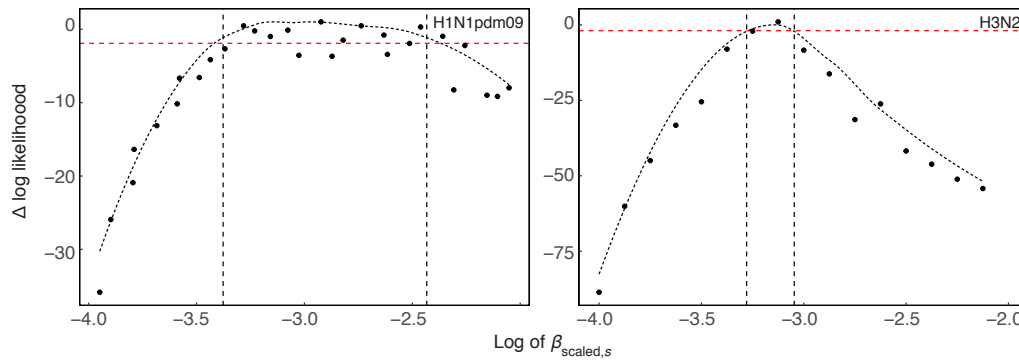

**Figure S20:** Likelihood profiles for the subtype-specific scaled transmission rate,  $\beta_{\text{scaled},s}$  for H1N1pdm09 and H3N2. The dashed horizontal line gives the threshold for statistical significance at a 95% level. The vertical lines denote the bounds of the 95% CI.

## 1 Short-term titer dynamics after PCR-confirmed infection

### 1.1 Model of short-term antibody boost after PCR-confirmed infection

To increase accuracy modeling the short-term post-infection titer dynamics (Eqs. 9-11, Fig. 1), we fit a “sub-model” to the observed titers before and after a PCR-positive swab (Fig. S14). We estimate the mean magnitude  $d_{a_i,s}$  and variability  $\sigma_{a_i,s}$  of the short-term titer boost and the dependence  $k_{a_i,s}$  of the boost on the pre-infection titer. This allows us to test for the presence of an antibody ceiling effect, which has been identified in studies of post-vaccination titer dynamics [41, 51].

To fit the sub-models, we fix the pre-infection latent titer,  $h_{i,s}(0)$ , to the observed pre-swab titer,  $h_{\text{obs}1,i,s}$ , allowing for two-fold uncertainty in the measured titer as in Eq. 16. We fix the latent time of infection  $t_{i,s}^X$  based on the date of the positive swab, assuming that the swab occurred during an infected period that we draw from a gamma distribution with fixed parameters (Table S4). We model the dynamics of the short-term titer rise as in Eq. 9, with the rate of rise  $r$  and time  $T_{\text{peak}}$  between infection and peak titer fixed as in Table S4. After the peak titer response, we assume that the titer wanes at rate  $w$  (fixed as in Table S4) until the time of the second observed value  $h_{\text{obs}2,i,s}$ .

## 1.2 Infection generates a variable short-term homosubtypic antibody boost that declines with increasing pre-infection titer.

The raw data suggest an antibody ceiling effect (Fig. S12). We perform linear regressions of individuals' observed changes in log titer on their observed pre-infection log titers, excluding one individual with  $\Delta t > 1$  y between the pre- and post-infection titer measurements. For both H1N1pdm09 and H3N2, the difference between pre- and post-infection log titers declines linearly with increasing pre-infection titer. The linear decline is statistically significant with  $p < 0.02$  for both subtypes. When we stratify the regressions in children and adults for each subtype, the decline is statistically significant with  $p \leq 0.01$  for children with both subtypes and for adults with H3N2 ( $p = 0.09$  for adults with H1N1pdm09).

The dynamical sub-models also support an antibody ceiling effect for both subtypes in children and adults (Table S1), such that higher pre-infection titer diminishes the boost. For both subtypes, models that include the antibody ceiling effect ("with  $k$ ") outperform models that do not ("without  $k$ ",  $k_{a,s} = 0$ ) in children and adults ( $\Delta AICc > 2$ , Table S1). Therefore, part of the individual variation in the acute infection response can be explained by differences in pre-existing titers. Simulations from the MLEs of the best fit models of the short-term dynamics reproduce the shape of the observed distribution of titer boosts in children and adults after PCR-confirmed infection for both subtypes (Fig. S13).

From the maximum likelihood parameter estimates of the best-fit sub-models, we find substantial variability in antibody titer responses after PCR-confirmed infection with both subtypes in children and adults (Table S5). This finding is consistent with other analyses [42, 28]. The inferred standard deviation of the lognormal titer boost distribution (Eq. 12) ranges from 0.9 to 1.9 log titer units among children and adults for H1N1pdm09 and H3N2 (Table S5). The mean magnitude of the boost is higher for H3N2 than for H1N1pdm09 in both age groups. The variability in the acute infection response and the difference in the response between subtypes and age groups suggest that threshold titer values used in sero-surveillance may not reliably predict infection in all individuals [6, 7].

## 1.3 Observed titer boosts secondary to symptomatic vs. asymptomatic infections and primary vs. secondary infections

The sub-model of the short-term titer dynamics does not distinguish between symptomatic infections and asymptomatic infections that may have been detected incidentally given illness in another household member, but the measured titer boosts might vary with symptom severity, which would bias our estimates. We define symptomatic infection by the presence of ARI in the two weeks before PCR-confirmed infection. Based on the household symptom diaries, approximately 70% of infections in both children and adults for both subtypes were symptomatic (Table S6). Children were more likely than adults for both subtypes to have a primary, or index case infection, meaning that no other household members had a PCR-confirmed infection or symptoms of an ARI in the two weeks prior to confirmed infection.

We compared the distributions of titer changes (the difference between the pre- and post-infection log titers normalized by the time between the pre- and post-infection sample dates) between symptomatic and asymptomatic infections and between primary and secondary infections (Fig. S15). We find no statistically significant difference in the mean normalized titer boost between symptomatic and asymptomatic infections for either subtype in children or adults. Similarly, we find no statistically significant differences when comparing primary and secondary infections. Therefore, the data suggest that the titer boosts estimated from PCR-confirmed infections in adults and children are not biased by differences in asymptomatic case detection.

## 2 Model validation and sensitivity analysis

### 2.1 The model reproduces the observed distribution of titer rises among individuals.

We compared the observed number of 2-, 4-, and 8-fold increases in consecutive titer measurements for H3N2 and H1N1pdm09 to the distributions obtained from 1000 replicate simulations of the model at the MLEs (Figs. S7, S8). The model reproduces the observed distributions in children and adults for both subtypes.

### 2.2 The model overestimates the variation in individuals' titers.

We compared the observed distribution of the coefficient of titer variation for individuals to the distribution obtained from 1000 replicate simulations of the model at the MLE (Figs. S9, S10). We separately analyzed the distributions for individuals with detectable initial titers ( $\geq 10$ ) and undetectable initial titers ( $< 10$ ). For both subtypes, the models tend to overestimate the individual variation over time. The bias is more pronounced among individuals with detectable baseline titers, which might be explained by the

measurement error. In our models, any simulated titer value  $<10$  takes the value 10 of an undetectable titer. Therefore, the variation in undetectable titers by measurement error alone is less than for titer values  $\geq 10$ .

### 2.3 The maximum likelihood parameter estimates are robust to assumptions about the initial conditions.

To initialize the full model, we drew each individual's time of most recent infection from the density of the subtype-specific influenza intensity in the seven years preceding the first observation. For comparison, we fitted the best-fit model for each subtype in children and adults using two alternative assumptions about the initial conditions. First, we drew the time of most recent infection from the density of the subtype-specific influenza intensity over the five years before the first observation ("Five years", Figs. S16, S17). Second, we drew the time of most recent infection uniformly over the seven years before the first observation rather than using  $L_s(t)$  ("Uniform draw", Figs. S16, S17). The maximum likelihood estimates of the alternative models fall within the 95% CI of the parameter estimates from the original assumption.

### 2.4 The inference results are robust to rescaling of the community intensity of H1N1pdm09 during the 2009 pandemic.

During the first wave of pandemic influenza H1N1pdm09 in 2009, increased reporting rates and changes in health-care seeking behaviors affected surveillance [15, 52]. We re-fitted our models of H1N1pdm09 after scaling the community flu intensity to adjust for these differences. A previous study estimated separate scaling factors for the relationship between the H1N1pdm09 intensity proxy and the risk of infection before and after a November 2009 change point [53]. We rescaled our estimate  $L_s(t)$  of the 2009 pandemic H1N1pdm09 intensity by multiplying the intensity before the change point by the ratio  $\rho$  of the estimated post- and pre-change point scaling factors in children ( $\rho = 0.25$ ) and adults ( $\rho = 0.29$ ). Fig. S11 shows the rescaled intensity. Notably, our observations begin at the end of the 2009 pandemic. Fewer than 6% of observations in children and fewer than 5% of observations in adults occurred before the November 2009 change point. Fewer than 1% of observations in children and adults occurred before October 2009. The models recovered the same MLEs given the rescaled pandemic intensity (Fig. S18).

### 2.5 The measurement error estimated from replicate titer measurements is consistent with literature estimates.

The sera from three visit dates were measured twice. In our models, we used the first titer measurement for each serum sample (the measurement recorded closest to the sampling date). To approximate the measurement error, we calculated the difference in measured titer between the second and first replicates (Fig. S19). For detectable titer levels ( $>10$ ), the standard deviation of the error distribution ( $SD = 1.23$  log titer units) matches the measurement error that we fixed in the model according to estimates from the literature (Table S4). The negative central tendency of the difference between the second and first replicates among detectable titers (median =  $-0.98$  log titer units) indicates that measured titer generally declines with time since sampling. Additionally, in line with previous analyses [11], we find that the error distribution is zero-inflated for undetectable titers  $<10$  (Fig. S19), justifying our use of a separate measurement error for undetectable titers. A previous study estimated the probability of 2-fold measurement error for undetectable titers [11]. We therefore calculated the corresponding error ( $\epsilon = 0.74$ ) in our normally distributed observation model that would yield the same probability of 2-fold measurement error for undetectable titer values. The observation model is non-invertible (Eq. 18). Therefore, while we use the measurement error to draw simulated observations from a normal distribution centered around the latent log titers, we cannot back-calculate the value of the latent titers from observed data. This is why we assign the initial baseline titer  $h_{\text{baseline},i,s}(0)$  from a possible two-fold range surrounding the lowest observed titer  $h_{\text{obs},i,s}^{\min}$  (Eq. 16).

### 2.6 Age-specific contact rates

We used age-specific contact rates estimated from a population-based survey of social contact patterns in Hong Kong that recorded daily contacts from over 1100 individuals in five age categories (Table S4, [49]). The authors calculated the relative number of contacts between individuals of each age category, adjusting for the propensity of individuals in each age class to respond to either paper or online questionnaires. To fix the daily number of contacts in our analysis, we multiplied the reported number of daily contacts from the reference group (children ages 0-10 years) by the relative number of contacts in each age category.

### 2.7 Historical influenza A subtype frequency data

Before 1968, annual subtype frequencies are specified by well-known durations of subtype circulation between historical pandemics ([54]). After 1968, annual frequencies are calculated from subtype-specific surveillance data for Hong Kong or from Southeast Asia

for years in which data from Hong Kong are unavailable. Between 1968 and 1997, subtype frequencies are the annual fraction of subtype-specific influenza A sequences in the Global Initiative on Sharing All Influenza Data (GISAID) database [55]. Aggregate regional data is used during years in which fewer than 30 sequences are available from Hong Kong or China. From 1997 to 2014, annual frequencies are the fraction of subtype-specific specimens reported by the Global Influenza Surveillance and Response System (GISRS) [56].
